1     **Human Gasdermin D and MLKL disrupt mitochondria, endocytic traffic and**  
2                     **TORC1 signaling in budding yeast**

3                     Marta Valenti<sup>1</sup>, María Molina<sup>1,\*</sup>, and Víctor J Cid<sup>1,2,\*</sup>

4

5

6

7

8

9

10    <sup>1</sup> Departamento de Microbiología y Parasitología, Facultad de Farmacia, and Instituto  
11    Ramón y Cajal de Investigaciones Sanitarias (IRYCIS); Universidad Complutense de  
12    Madrid; Madrid, 28040; Spain.

13    <sup>2</sup> Lead contact

14    \* Corresponding authors

15    Address for correspondence: Dpto. de Microbiología y Parasitología. Facultad de Farmacia.

16    Universidad Complutense de Madrid. Pza. Ramón y Cajal s/n. 28040. Madrid, Spain

17    Tel. +34 91 3941888

18    E-mail María Molina: [molmifa@ucm.es](mailto:molmifa@ucm.es)

19    E-mail Víctor J. Cid: [vicjcid@ucm.es](mailto:vicjcid@ucm.es)

20

## 21 **Summary**

22 Gasdermin D (GSDMD) and mixed lineage kinase domain-like protein (MLKL) are the pore-  
23 forming effectors of pyroptosis and necroptosis, respectively, with the capacity to disturb  
24 plasma membrane selective permeability and induce programmed cell death. The budding  
25 yeast *Saccharomyces cerevisiae* has long been used as a simple eukaryotic model for the  
26 study of proteins associated with human diseases by heterologous expression. In this work,  
27 we expressed in yeast both GSDMD and its N-terminal domain [GSDMD(NT)] to  
28 characterize their cellular effects, and compare them to those of MLKL. GSDMD(NT) and  
29 MLKL inhibited yeast growth, formed cytoplasmic aggregates, and fragmented  
30 mitochondria. Loss-of-function point mutants of GSDMD(NT) showed affinity for this  
31 organelle. Besides, GSDMD(NT) and MLKL caused an irreversible cell cycle arrest through  
32 TORC1 inhibition, and disrupted endosomal and autophagic vesicular traffic. Our results  
33 provide a basis for a humanized yeast platform to study GSDMD and MLKL, a useful tool  
34 for structure-function assays and drug discovery.

## 35 **Introduction**

36 Pyroptosis and necroptosis are among the programmed cell death mechanisms that  
37 guarantee cell survival under circumstances in which internal or external factors compromise  
38 tissue or cell homeostasis [1, 2]. The effector of both types of cell death is a pore-forming  
39 protein, namely gasdermin D (GSDMD) for pyroptosis and mixed lineage kinase domain-  
40 like protein (MLKL) for necroptosis [3-7]. Despite sharing some features, the pathways that  
41 lead to their activation and the mechanism by which they permeabilize the plasma  
42 membrane differ substantially.

43 Pyroptosis is elicited upon assembly and activation of nucleotide oligomerization domain  
44 (NOD)-like receptors (NLRs) or absent in melanoma-2 (AIM2)-like receptors (AMRs), which

45 are cytosolic innate immune receptors that respond to multiple damage-associated  
46 molecular patterns (DAMPs) and pathogen-associated molecular patterns (PAMPs) [8].  
47 These receptors build up a supramolecular organizing center (SMOC) called inflammasome  
48 by recruiting the apoptosis-associated speck-like (ASC) adaptor protein and the  
49 proinflammatory Caspase-1 protease [9]. GSDMD is constituted by two domains: the N-  
50 terminal domain (NTD), which is responsible for the pore-forming activity of the protein and  
51 the interaction with membrane lipids through a positively charged region; and the C-terminal  
52 domain (CTD), which plays an autoinhibitory role and keeps the protein in an inactive  
53 conformation under resting conditions [10, 11]. After inflammasome activation, pro-  
54 inflammatory caspases cleave the linker between the NTD and the CTD of GSDMD [3, 4].  
55 Alternatively, Caspase-11 can directly sense cytosolic bacterial lipopolysaccharide and  
56 cleave GSDMD [12, 13]. The released NTD endures a conformational change that allows  
57 the protein to interact with negatively charged lipids of the plasma membrane, where it forms  
58 ring-shaped oligomers and eventually pores [10, 11, 14]. Cells die as a consequence of the  
59 loss of membrane selective permeability [7]. However, the plasma membrane is not the only  
60 target of GSDMD, as it damages other internal structures, such as mitochondria [15-19] or  
61 endosomes [20-22].

62 On the contrary, different innate immune receptors, including death receptors, Toll-like  
63 receptors (TLRs), and receptors for DNA/RNA, trigger necroptosis [23]. In all cases,  
64 necroptotic signaling converges in the phosphorylation of the receptor-interacting  
65 serine/threonine-protein kinase 3 (RIPK3) [23], which in turn phosphorylates the residues  
66 T357/S358 of MLKL [6]. MLKL structure comprises a 4-helix bundle (4HB) domain that is  
67 responsible for the interaction with negatively charged lipids of the plasma membrane and  
68 oligomerization; a pseudokinase (PK) domain, where the activation loop resides; and a  
69 brace that connects these two domains and might also play a role in the interaction with

70 membrane lipids [5, 6, 24, 25]. Phosphorylation of MLKL by RIPK3 induces a conformational  
71 change that unleashes the 4HB domain, which can thus interact with plasma membrane  
72 lipids, oligomerize and form pores, finally causing cell demise due to the perturbation of  
73 cellular homeostasis [5, 26]. Similar to GSDMD, MLKL can also damage other intracellular  
74 structures [27-30].

75 Although the membrane pore-forming activity of GSDMD and MLKL has been extensively  
76 studied, some mechanistic details remain poorly characterized, especially regarding their  
77 intracellular effects and targets. The budding yeast *Saccharomyces cerevisiae* has been  
78 widely used as a simple eukaryotic model to mirror complex aspects of mammalian cell  
79 biology [31, 32] due to the high degree of conservation of their molecular pathways and  
80 cellular organization [33]. Notably, based on its ready genetic manipulation, researchers  
81 have developed a plethora of genetic, genomic, and synthetic biology tools for this model,  
82 yielding an alternative platform for the molecular characterization of pathways related to  
83 human diseases [34]. Humanized yeast models can be based on the substitution of  
84 orthologous genes by their human counterparts [35] or on the integration of human activities  
85 or pathways that are naturally lacking in yeast [36, 37]. As a unicellular organism, regulated  
86 cell death pathways in yeast are constrained compared to mammalian cells [38], and  
87 orthologs to pore-forming effector proteins GSDMD or MLKL are absent. We previously  
88 studied human Caspase-1 in the yeast model and demonstrated that it can efficiently  
89 recapitulate *in vivo* GSDMD cleavage [39]. Besides, MLKL was recently expressed in  
90 budding yeast to establish a model for mechanistic studies on necroptosis [40].

91 In this work, we aimed to comparatively characterize the performance of the effector proteins  
92 of pyroptosis and necroptosis in *S. cerevisiae*. We found that the active form of these  
93 proteins inhibits yeast growth, causes cell death, and keeps its capacity to aggregate.  
94 However, rather than targeting the plasma membrane, toxicity in yeast is exerted by cell

95 cycle arrest through target-of-rapamycin complex 1 (TORC1) inhibition, alterations of the  
96 endosomal traffic and autophagy, and perturbation of the mitochondrial network.

## 97 **Results**

### 98 **The NTD of GSDMD and the 4HB domain of MLKL inhibit yeast growth**

99 In human cells, the NTD of GSDMD, released after Caspase-1-mediated cleavage at D275,  
100 is capable of assembling pores through its ability to interact with negatively charged lipids in  
101 the plasma membrane, leading to pyroptotic cell death [3, 4]. To establish a yeast model  
102 that could be useful to shed some light on open questions in the field, we cloned into *S.*  
103 *cerevisiae* expression vectors cDNAs expressing both the full-length and the NTD (NT)  
104 truncated versions of this protein (Fig. 1A) fused to enhanced GFP (EGFP) in C-terminal,  
105 both under the control of galactose-inducible *GAL1* promoter. After 5 h of induction in  
106 galactose-containing media, we confirmed by immunoblotting that both proteins were  
107 expressed (Fig. 1B). However, only GSDMD(NT) strongly impaired yeast growth both in  
108 solid (Fig. 1C) and liquid medium, an effect that could be detected early in the exponential  
109 growth phase (Fig. 1D). Fusions of GSDMD to a FLAG epitope, as an alternative to the  
110 larger EGFP tag, showed the same behavior: GSDMD(NT)-FLAG inhibited yeast growth,  
111 whereas full-length GSDMD-FLAG was innocuous (Fig. S1A).

112 MLKL is a pore-forming protein involved in necroptosis, a different type of programmed cell  
113 death in higher cells [5, 7]. Although our primary goal was to model GSDMD activity in yeast,  
114 we found it interesting to compare GSDMD(NT) to MLKL, thus delving into putative  
115 differences between pyroptosis and necroptosis executioners. MLKL is activated through  
116 phosphorylation by RIPK3 in mammalian cells [41, 42]. A recent report showed that human  
117 MLKL is not phosphorylated when heterologously expressed in yeast unless it is co-  
118 expressed with RIPK3 [40]. To by-pass the phosphorylation step, we cloned both the wild-

119 type *MLKL* gene and a phosphomimetic T357E/S358D version, referred hereafter to as  
120 MLKL(PM), in the same expression vector used for GSDMD (Fig. 1E). Both proteins were  
121 efficiently produced in yeast (Fig. 1F), reaching much higher levels of expression than  
122 GSDMD (Fig. S1B), and their expression led to mild growth inhibition (Fig. 1G-H). Some  
123 controversy has arisen about whether MLKL phosphorylation is sufficient to activate this  
124 protein, with studies using the phosphomimetic mutant protein yielding contradictory results  
125 [27, 41, 43]. Our results in yeast show no significant differences in growth inhibition between  
126 phosphomimetic (PM) and wild-type (WT) versions of MLKL. Previous reports state that the  
127 4HB domain located at the N-terminus of this protein is responsible and sufficient for the  
128 interaction of MLKL with membrane lipids and subsequent permeabilization of the  
129 membrane, while the PK domain might play a regulatory and/or autoinhibitory role [5, 44].  
130 To test this, we cloned the NTD of MLKL, comprising the 4HB plus the brace region,  
131 hereafter referred to as MLKL(1-182), in the same vector used for the other MLKL and  
132 GSDMD constructs (Fig. 1E). The level of expression of this truncated form of MLKL was  
133 comparable to those of the full-length WT and PM versions (Figs. 1F and S1B), but it exerted  
134 higher growth inhibition, as reflected in Fig. 1G-H.

135 Overall, these results prove that both GSDMD and MLKL are functional in our experimental  
136 setting, allowing us to establish an *in vivo* model to explore their activity and mechanism of  
137 action. Interestingly, the effect of GSDMD(NT) on yeast growth is more severe *per se* than  
138 that of the MLKL 4HB domain. Also, our model recapitulates the autoinhibitory function of  
139 the C-terminal extensions of both proteins, which is tighter in the case of GSDMD as  
140 compared to MLKL.

141 **In yeast, the NTD of GSDMD and MLKL aggregate in cytoplasmic spots and reduce**  
142 **cell viability, but do not cause severe cell lysis**

143 Once activated, GSDMD and MLKL are known to insert into cellular membranes through  
144 positively charged patches on their surface that allow them to interact with negatively  
145 charged lipids, particularly cardiolipin, phosphatidylserine, and phosphoinositides [4-6, 10].  
146 Previously, we reproduced recognition of the plasma membrane by positively charged  
147 human proteins involved in innate immune signaling in yeast, like Toll/interleukin-1 receptor  
148 domain-containing adapter protein (TIRAP) [45]. Thus, we expected yeast growth inhibition  
149 by GSDMD and MLKL to be linked to their localization at the plasma membrane, leading to  
150 its disruption. However, none of the GSDMD and MLKL EGFP fusions produced in yeast  
151 was detected at the plasma membrane by fluorescence microscopy (Fig. 2A-B). Full-length  
152 GSDMD showed a diffuse nucleo-cytoplasmic pattern typical of soluble proteins, while  
153 GSDMD(NT) formed small foci distributed throughout the cell cytoplasm. In the case of  
154 MLKL, we observed that the WT and PM constructs formed one or two larger, brighter spots  
155 per cell. However, in MLKL(1-182)-expressing cells, bright spots were less frequent and  
156 were substituted by small numerous foci, similar to the ones observed for GSDMD(NT).  
157 Immunoblotting on lysates from these cultures processed under non-reducing conditions  
158 revealed an enhanced presence of high molecular weight protein aggregates in cells bearing  
159 GSDMD(NT) and the different constructs of MLKL, but not in the case of full-length GSDMD  
160 (Fig. 2C-D).

161 The observed cytoplasmic large bright spots formed by MLKL-EGFP and MLKL(PM)-EGFP  
162 might reflect the accumulation of misfolded protein aggregates within the cell. To assess this  
163 possibility, we transformed the different GSDMD and MLKL-producing plasmids in a yeast  
164 strain in which Hsp104, one of the main chaperones involved in the formation of different  
165 protein bodies [46], was tagged with the fluorescent protein mCherry. Under basal  
166 conditions, Hsp104 remains soluble in the nucleus and cytoplasm of the cells. When cells  
167 are subdued to a change in cellular homeostasis, this protein relocates to proteostatic stress

168 compartments [46]. Both MLKL and MLKL(PM) induced the formation of Hsp104  
169 aggregates, while GSDMD, GSDMD(NT), and MLKL(1-182) did not (Fig. 2E, left panel). In  
170 the case of MLKL,  $74\pm 11\%$  of Hsp104 aggregates colocalized with MLKL spots; and in the  
171 case of MLKL(PM),  $69\pm 12\%$  of Hsp104 aggregates colocalized with MLKL(PM) spots (Fig.  
172 2E, right panel). Thus, MLKL induces the formation of proteostatic stress compartments  
173 when overexpressed in yeast, whereas the more toxic GSDMD(NT) and MLKL(1-182)  
174 neither trigger proteostatic stress nor co-localize with Hsp104.

175 If pore formation in the plasma membrane was the cause of strong growth inhibition of  
176 GSDMD(NT) and MLKL(1-182) in yeast, we should expect severe cell lysis to occur. Even  
177 though neither GSDMD(NT)-EGFP nor MLKL(1-182)-EGFP seemed to associate with the  
178 yeast plasma membrane as observed by fluorescence microscopy, we performed propidium  
179 iodide (PI) staining as a readout of putative loss of plasma membrane selective permeability  
180 and analyzed the cultures by flow cytometry (Fig. 3A-B). Although there was a significant  
181 increase in the percentage of PI-positive cells both for GSDMD(NT) and MLKL(1-182)  
182 compared to the negative control or their full-length counterparts, the overall percentage of  
183 lysed cells was too low ( $<8\%$ ) after 5h of induction. At longer incubation times (12 h post-  
184 induction) this percentage increased 3 to 5-fold for all transformant cells, particularly in the  
185 case of GSDMD(NT) (Fig. S2A).

186 A previous report highlighted that the fusion of a bulky C-terminal tag in GSDMD(NT) might  
187 reduce the efficiency of pyroptosis [47]. To determine whether the EGFP tag might be  
188 hindering GSDMD(NT) interaction with the plasma membrane, we performed the same  
189 experiment with a C-terminal FLAG fusion. Indeed, the percentage of PI-positive  
190 GSDMD(NT)-FLAG-expressing cells was significantly higher as compared to that of cells  
191 producing GFP-tagged GSDMD(NT) (Fig. S2B), reaching 25% of the population after 5h of



192 induction. Thus, the EGFP tag is likely preventing cell lysis by interfering with GSDMD(NT)  
193 translocation to the plasma membrane in yeast.

194 Given that the severity of growth inhibition induced by GSDMD(NT)-EGFP and MLKL(1-  
195 182)-EGFP at early time points (Fig. 1D and H) did not correlate with the mild increase in  
196 the percentage of lysed PI-positive cells (Fig. 3A-B), we were prompted to examine cell  
197 viability through a microcolony formation assay. We observed a decrease in viability after 5  
198 h of induction in galactose-containing media, particularly significant in the case of  
199 GSDMD(NT) and MLKL(1-182) (Fig. 3C-D), which follows the same trend as growth  
200 inhibition. Altogether, these results indicate that GSDMD(NT)-EGFP and MLKL(1-182)-  
201 EGFP cause a reduction of cell viability soon after induction by a mechanism that differs  
202 from the permeabilization of the plasma membrane mechanism expected for pore-forming  
203 effectors. But if GSDMD(NT)-EGFP is not causing cell lysis, why is it so toxic for yeast cells?  
204 We hypothesized that accumulation of GSDMD(NT)-EGFP in intracellular membranes was  
205 responsible for the damage leading to severe loss of viability, making this setting suitable  
206 for the study of the effects of GSDMD on its cytoplasmic targets.

### 207 **The NTDs of GSDMD and MLKL alter the yeast mitochondrial network**

208 Different reports prove that GSDMD(NT) can interact with mitochondria and cause  
209 mitochondrial depolarization, fragmentation, and release of mitochondrial DNA to the cytosol  
210 by a yet undefined mechanism [15-17, 19]. MLKL causes a similar effect on mitochondria  
211 [6, 30]. We questioned whether the mitochondrial network was affected in the yeast model.  
212 For this purpose, we co-expressed the two GSDMD versions with the mitochondrial marker  
213 Ilv6-mCherry and visualized cells by confocal fluorescence microscopy. As in mammalian  
214 cell lines, around 40% of yeast cells expressing GSDMD(NT)-EGFP showed fragmented  
215 mitochondria, but the majority of GSDMD(NT)-EGFP spots did not colocalize with them (Fig

216 **4A-B and Fig. S3A**). However, we could not detect significant changes in mitochondrial  
217 membrane potential or ROS levels (data not shown).

218 Then, we made the same confocal microscopy experiments with the different constructs of  
219 MLKL. The effect of MLKL(1-182) on the mitochondrial network was less severe than that  
220 of GSDMD(NT), as only 15% of the cells had disrupted mitochondria (**Fig. 4C-D and Fig.**  
221 **S3B**). However, contrary to GSDMD(NT), MLKL(1-182) spots frequently colocalized with  
222 mitochondria. As for full-length MLKL and MLKL(PM), they neither impacted the  
223 mitochondrial network nor colocalized with them (**Fig. 4C-D and Fig. S3B**). Thus, as reported  
224 in mammalian cells, the yeast mitochondrial network is targeted by the NTDs of GSDMD  
225 and MLKL, providing a plain model to study their interaction with this organelle.

226 **Key point mutations at interaction interfaces of the NTD of GSDMD abrogate**  
227 **cytoplasmic aggregates and growth inhibition**

228 After cleavage, GSDMD(NT) monomers undergo a conformational change that allows them  
229 to bind membrane lipids and oligomerize. Liu *et al.* [11] described that this oligomerization  
230 process is driven through three interaction interfaces and found critical residues within those  
231 interfaces for pyroptotic activity in mice. To challenge our yeast model for functional studies  
232 on the human protein and, particularly, to evaluate the intracellular consequences of  
233 GSDMD mutation, we selected one mutation for each interface (L60G for interface I; F81D  
234 for interface II; and I91D for interface III) and mutated the equivalent amino acids in human  
235 GSDMD(NT)-EGFP (L59G, F80D, and I90D, respectively). See **Fig. S4A-B** for human-  
236 mouse GSDMD(NT) alignment and location of the residues in the tertiary structure of  
237 homologous mouse GSDMA3. Liu *et al.* [11] also described the interactions between the  
238 NTD and CTD of mouse GSDMD that maintain the protein inactive under basal conditions  
239 and characterized mutants that acquired spontaneous pyroptotic activity due to alterations  
240 in such interactions [11]. We selected among them the one that most enhanced pyroptotic

241 markers, A380D, and mutated the equivalent residue in human full-length GSDMD-EGFP  
242 (A377D). Finally, GSDMD(NT) interacts with plasma membrane lipids through a positively  
243 charged patch on its surface formed by four basic residues (R138/K146/R152/R154 in  
244 mouse GSDMD). Replacement of those four residues by alanine blocks pyroptosis because  
245 it hinders the assembly of the pores [10]. To explore the effect of these mutations in our  
246 model we produced the equivalent human GSDMD(NT)-EGFP quadruple mutant  
247 (R137A/K145A/R151A/R153A), hereafter referred to as 4A. As shown in Fig. 5A, mutation  
248 of residues identified as part of interaction interfaces I (L59G) and II (F80D) of GSDMD(NT)-  
249 EGFP monomers, as well as the blockade of interaction with membrane phospholipids (4A),  
250 were no longer inhibitory for yeast growth. On the contrary, the mutation of I90, which  
251 belongs to interface III, did not alter its toxicity. These mutants showed a similar behavior  
252 when the EGFP tag was replaced by a FLAG epitope, with the only difference that the I90D  
253 mutant displayed partial loss-of-function (Fig. S4C), even though it failed to permeabilize the  
254 plasma membrane after 5 h of induction, measured by PI uptake (Fig. S4D). These results  
255 suggest that human GSDMD(NT) monomers recapitulate their interactions among them and  
256 with lipid surfaces in yeast, and that such mechanisms are conserved between the human  
257 protein and its mouse homolog, at least for interfaces I and II. Interface III might play a  
258 secondary role, might be less critical for the formation of polymers that interfere with yeast  
259 essential cellular functions, or may not be as crucial for human GSDMD(NT) as for the  
260 murine protein. Finally, full-length GSDMD A377D did not gain spontaneous activity in yeast  
261 cells since it behaved like WT GSDMD in growth assays (Fig. 5A). All the mutant versions  
262 seemed stable in yeast and were expressed in similar levels, as determined by  
263 immunoblotting (Fig. 5B).

264 Next, we evaluated possible changes in protein localization and aggregation of the different  
265 mutant proteins by fluorescence microscopy and immunoblotting in non-reducing conditions,

266 respectively. As shown in **Fig. 5C**, the subcellular distribution of non-functional mutants  
267 (L59G, F80D, and 4A) was neither in small numerous foci like the WT GSDMD(NT) nor  
268 uniformly nucleocytoplasmic like full-length GSDMD. Rather, they seemed to be diffusely  
269 attached to intracellular structures, although in the case of GSDMD(NT) 4A, this pattern was  
270 less pronounced. By contrast, the functional mutant I90D did not show differences compared  
271 to GSDMD(NT) WT, forming numerous small spots within the cells. As for full-length  
272 GSDMD A377D, it showed a diffuse distribution. Finally, immunoblotting in non-reducing  
273 conditions revealed, as expected, that only functional proteins [i.e., GSDMD(NT) WT and  
274 I90D] formed higher-order oligomers (**Fig. 5D**). The behavior of these different loss-of-  
275 function mutants further underscore that there is a strong correlation between growth  
276 inhibition and aggregation of GSDMD(NT) in yeast.

### 277 **Non-functional mutants of the NTD of GSDMD colocalize with the mitochondrial** 278 **network**

279 We have shown above that GSDMD(NT) interferes with yeast mitochondria, so we aimed to  
280 verify that loss-of-function GSDMD(NT) mutants failed to disturb this organelle. For this  
281 purpose, we co-expressed the corresponding mutants with the mitochondrial marker Ilv6-  
282 mCherry and visualized the cells by confocal microscopy. As predicted, the mitochondrial  
283 network of cells expressing GSDMD(NT) L50G, F80D and 4A was intact, while that of cells  
284 expressing GSDMD(NT) I90D was fragmented (**Fig. 6 and Fig. S5**). Interestingly, the EGFP  
285 fusions of non-functional mutants of GSDMD(NT), namely L50G, F80D, and, to a lesser  
286 extent, 4A, colocalized with the mitochondrial network under basal conditions. These data  
287 suggest that, when GSDMD(NT) fails to homopolymerize, the individual monomers  
288 associate to mitochondrial membranes.

### 289 **The NTDs of GSDMD and MLKL cause cell cycle arrest through inhibition of TORC1**

290 Although the effects of the NTDs of GSDMD and MLKL on yeast mitochondria are  
291 significant, they are not severe enough to account for the strong growth inhibition and loss  
292 of viability observed, especially in the case of GSDMD(NT)-expressing cells. We  
293 hypothesized that additional factors should be contributing to the resulting phenotype. In the  
294 previous microscopy experiments, we noticed the presence of an unusual fraction of  
295 unbudded cells, especially when we expressed GSDMD(NT). To address whether the  
296 growth defect observed was linked to an arrest in cell cycle progression, we induced the  
297 expression of all GSDMD and MLKL versions for 5 h in galactose-containing media, and  
298 then analyzed cellular DNA content by flow cytometry. As shown in **Fig. 7A**, GSDMD(NT)  
299 and MLKL(1-182) caused a statistically significant increase in the percentage of cells in G1  
300 phase (non-replicated DNA content) in asynchronous cultures compared to control cells or  
301 to their respective full-length versions. Besides, this percentage was higher for GSDMD(NT)  
302 than for MLKL(1-182), in correlation with their respective growth inhibition and effect on cell  
303 viability. These results were obtained by expressing fusions to EGFP, but GSDMD(NT)  
304 fused to FLAG induced a similar phenotype (**Fig. S6A**), dismissing the possibility of an  
305 artifact caused by the epitope. To confirm a suspected G0/G1 cell cycle arrest, we stained  
306 yeast cells expressing GSDMD and GSDMD(NT) with rhodamine-conjugated phalloidin (Rd-  
307 phalloidin) to visualize the actin cytoskeleton, which supports polarized growth for budding.  
308 As expected for a cell cycle arrest in G0/G1, we observed an increase in the percentage of  
309 unbudded cells as well as a decrease in the percentage of cells with a polarized cytoskeleton  
310 among the unbudded cells (i.e., cells ready to start a new round of cell cycle) when  
311 GSDMD(NT) was expressed, as compared to control or GSDMD-expressing cells (**Fig.**  
312 **S6B**), indicating an arrest in cell cycle progression. MLKL(1-182) induced a similar effect  
313 (**Fig. S6C**).

314 The TORC1 complex, homolog to mammalian mTORC1, is one of the core regulators of cell  
315 cycle and growth in yeast [48]. Yeast TORC1 senses the concentration of amino acids  
316 available in the medium and regulates yeast growth accordingly. In the presence of  
317 nutrients, the regulatory exit from G0 complex (EGOC) interacts and activates TORC1, and  
318 the kinases of this complex, Tor1/Tor2, phosphorylate their substrates to promote cell  
319 proliferation. Under starvation conditions, TORC1 is inhibited and halts cell growth [49].  
320 Previous works have used the electrophoretic mobility shift caused by phosphorylation of  
321 Sch9, one of the main targets of TORC1, as a readout to evaluate TORC1 activity [50]. This  
322 protein controls ribosome biogenesis, protein translation, and cell cycle progression [50]. To  
323 determine whether TORC1 inhibition was the mechanism underlying cell cycle arrest in  
324 yeast cells expressing GSDMD(NT) and MLKL(1-182), we co-expressed the plasmids  
325 carrying these constructs with a plasmid expressing an Sch9-HA fusion. Cells transformed  
326 with an empty vector were used as a negative control of TORC1 inhibition, while cells treated  
327 with rapamycin were used as a positive control. As shown in **Fig. 7B**, the Sch9 mobility shift  
328 observed in control cells, completely disappeared in the presence of rapamycin. A significant  
329 decrease in Sch9 phosphorylation was also observed in cells expressing either GSDMD(NT)  
330 or MLKL(1-182) compared to control cells, indicative of TORC1 inhibition.

331 TORC1 inhibition induces several adaptations for survival under nutrient depletion in the  
332 yeast cell, including the inhibition of transcription [51] and the induction of autophagy [52].  
333 To corroborate our results, we evaluated possible changes in RNA transcription by  
334 measuring the phosphorylation of Maf1, a negative regulator of RNA polymerase III that is  
335 phosphorylated by TORC1 [53, 54]. Similarly, we assessed changes in autophagy signaling  
336 by measuring Atg13 phosphorylation. TORC1 inhibition leads to its dephosphorylation,  
337 triggering autophagy [52]. Equivalently to **Fig 7B**, we co-transformed the plasmids carrying  
338 GSDMD and MLKL constructs with plasmids expressing either Maf1-HA or HA-Atg13. Cells

339 bearing an empty vector were used as a negative control, while cells treated with rapamycin  
340 were used as a positive control. Surprisingly, while Maf1 and Atg13 did become  
341 dephosphorylated in cells expressing GSDMD(NT) as compared to control cells, there was  
342 no significant effect in cells expressing MLKL(1-182) (Fig. 7C-D). This could mean that the  
343 mechanism by which these proteins interfere with TORC1 signaling differs. Altogether, our  
344 results show that both GSDMD(NT) and MLKL(1-182) cause a cell cycle arrest through  
345 TORC1-Sch9 signaling pathway inhibition, but differ in the effect on RNA transcription and  
346 autophagic signaling. This could explain the differences in the magnitude of the cell growth  
347 defect induced by GSDMD(NT) and MLKL(1-182).

#### 348 **GSDMD(NT) and MLKL disrupt autophagic flux**

349 As stated above, the decrease of TORC1-imposed Atg13 phosphorylation is the signal that  
350 triggers the autophagic flux [52]. We decided to test by immunoblotting whether  
351 GSDMD(NT) effectively induced this pathway, using Atg8-GFP degradation as a marker  
352 [55]. When autophagy is functional, Atg8-GFP is transported together with the  
353 autophagosome to the vacuoles (equivalent to mammalian lysosomes) and degraded,  
354 releasing a GFP moiety that can be visualized as a  $\approx 25$  kDa band with anti-GFP antibodies  
355 in immunoblots. Contrary to what we expected, expression of GSDMD(NT) failed to  
356 significantly induce autophagy as compared to a rapamycin-treated control (Fig. 8A). Since  
357 autophagy is crucial for cell survival under nitrogen starvation conditions, and the blockade  
358 of this pathway when TORC1 is inhibited leads to loss of viability [56, 57], this result might  
359 explain the loss of viability observed in Fig. 3C for GSDMD(NT)-expressing cells.

360 We then assessed if GSDMD and MLKL-expressing cells were competent to induce  
361 autophagy when it is triggered by an external stimulus. Thus, we treated cells with rapamycin  
362 for 2 h after inducing the expression of the heterologous proteins for 5 h in galactose-  
363 containing media. Cells bearing an empty vector and treated for 2 h with rapamycin were

364 used as a positive control of autophagy and untreated cells as a negative control. Neither  
365 cells expressing GSDMD(NT) nor cells expressing any of the MLKL constructs could induce  
366 autophagy with the same efficiency as control cells, although the effect was only statistically  
367 significant for cells expressing the different MLKL versions (Fig. 8B). We confirmed these  
368 results by visualizing Atg8-GFP localization in cells under the same conditions of rapamycin  
369 treatment (Fig. 8C). In control cells and cells expressing full-length GSDMD, GFP  
370 fluorescence mostly accumulated within the vacuole or in a single cluster per cell, consistent  
371 with the induction of autophagy. GSDMD(NT) did not seem to hamper accumulation of  
372 fluorescence in the vacuole as a readout of autophagy, while MLKL versions did lower the  
373 percentage of cells degrading Atg8-GFP. Yet, in cells expressing both GSDMD(NT) and all  
374 MLKL versions, we detected an increase in the percentage of cells that showed cytosolic  
375 Atg8 localization, revealing cells could not form autophagosomes at all in response to  
376 rapamycin. Moreover, indicating a problem in the traffic of autophagosomes towards the  
377 vacuole, MLKL constructs tended to accumulate multiple Atg8 clusters. This effect was  
378 significantly patent in the case of MLKL(1-182), as compared to GSDMD(NT). In conclusion,  
379 although to different degrees, GSDMD(NT) and MLKL disturb autophagic traffic, even  
380 though they should trigger autophagy as a consequence of TORC1 inhibition and Atg13  
381 dephosphorylation. This could be explained if human pyroptotic and necroptotic effectors  
382 caused a direct blockade of vesicular traffic.

### 383 **The NTDs of GSDMD and MLKL distinctly disrupt endosomal traffic**

384 TORC1 is localized primarily on the vacuolar membrane and endosomes under basal  
385 conditions, where it interacts with EGO1 to become activated. Previous reports highlight  
386 that homotypic fusion and protein sorting (HOPS), and class C core vacuole/endosome  
387 tethering (CORVET) complexes, as well as the endosomal sorting complex required for  
388 transport (ESCRT), all implicated in membrane and endosome fusion events, are important



389 for the proper functioning of the TORC1 signaling pathway. Their disruption inhibits yeast  
390 growth even in the presence of nutrients [58-61]. The vesicular traffic machinery is also  
391 necessary to lead Atg8 to the vacuole during autophagy [62, 63]. Besides, several previous  
392 reports have related GSDMD and MLKL function to perturbations in the endosomal transport  
393 [20-22, 27-30]. Overall, our results suggested that GSDMD(NT) and all the MLKL constructs  
394 tested could be interfering with yeast endosomal traffic, consequently inhibiting TORC1  
395 while hampering autophagy. To test this hypothesis, we studied whether endocytosis was  
396 altered by using the endocytic fluorescent marker FM4-64. GSDMD(NT) and the different  
397 constructs of MLKL interfered with proper traffic of FM4-64 to the vacuolar membrane (Fig.  
398 9A-C), although some differences among them were noted. About 25% of GSDMD(NT)-  
399 expressing cells accumulated FM4-64 in the prevacuolar compartment (reminiscent of the  
400 well-established class E phenotype of yeast vacuolar protein sorting (*vps*) mutants), and  
401 another 25% displayed a diffuse FM4-64 signal throughout the cytoplasm (typical of a class  
402 C *vps* phenotype). In the case of MLKL, the three versions acquired a class C *vps*-like  
403 phenotype. The cause for each of these *vps* phenotypes is the alteration of distinct specific  
404 components of the endosomal pathway: the class C phenotype is associated with alterations  
405 in the HOPS complex [64, 65], involved in the fusion of late endosomes to the vacuoles, and  
406 the class E phenotype is associated with defects in the function of the ESCRT complexes  
407 [64, 66], involved in the formation of multivesicular bodies (MVBs).

408 To verify these results, we assessed the impact of the expression of the GSDMD(NT)  
409 mutants described before on the endosomal traffic. As expected, like in the case of  
410 mitochondrial disruption, cells expressing the non-functional L59G, F80D, and 4A  
411 GSDMD(NT) mutants endocytosed the dye as efficiently as the control or full-length  
412 GSDMD, while cells expressing the functional GSDMD(NT) I90D behaved like GSDMD(NT)  
413 WT with a mixed class C and E *vps*-like phenotype (Fig. 9D).

414 Then, we evaluated vacuolar morphology using Vph1-GFP, a vacuolar membrane protein,  
415 as a marker. The results obtained supported our observations with FM4-64 (Fig. S7): in cells  
416 expressing GSDMD(NT), Vph1-GFP signal accumulated at the prevacuolar compartment in  
417 around 30% of the population, while cells expressing any of the versions of MLKL presented  
418 a mixed phenotype, with 10-15% of the cells displaying the same phenotype as GSDMD(NT)  
419 and a similar number showing disrupted vacuoles. Although we cannot discard completely  
420 that GSDMD(NT) or any of the constructs of MLKL are interacting directly with endosomal  
421 or vacuolar membrane granules, they did neither colocalize with endosomes nor with Vph1  
422 (data not shown). These data support the hypothesis that TORC1 inhibition and the  
423 disruption of autophagy might be related to the interference of GSDMD(NT) and MLKL with  
424 endosomal traffic.

## 425 **Discussion**

426 Here we report a yeast-based model for molecular studies on the effector proteins of  
427 pyroptosis and necroptosis. Despite the phylogenetic distance, heterologous expression in  
428 *S. cerevisiae* provides a ready experimental platform, a sort of an “*in vivo* cellular test tube”  
429 to elucidate particular mechanistic details on GSDMD and MLKL function. In the absence of  
430 homologous pathways, yeast supplies a cellular environment to study the fundamental  
431 properties of these pore-forming effectors. Furthermore, our previous work demonstrated  
432 that GSDMD can be processed by Caspase-1 in the yeast cell [39], and work by Ji *et al.*[40],  
433 proving that MLKL phosphorylation and activation can be recapitulated in yeast, opens the  
434 way for developing synthetic models to aid studies on these human cell death pathways.

435 To allow comparison of both human proteins, in the case of MLKL, we artificially produced  
436 the phosphomimetic mutant MLKL(PM), as well as a truncated MLKL(1-182) version, which  
437 should structurally compare to the constitutively active NTD of GSDMD released by  
438 Caspase-1 cleavage. Although it has been shown that human RIPK3 and MLKL co-

439 expression in yeast enhances the intrinsic toxicity of the former in this model [40], in our  
440 hands a human phosphomimetic MLKL T357E/S358D [MLKL(PM)] behaved like the wild  
441 type. This agrees with studies arguing that mouse MLKL(PM) gains activity while the human  
442 protein mutated in the equivalent phosphorylation sites may not. Rather, in contrast to the  
443 mechanistic evidence raised in mice, it has been suggested that phosphorylation by RIPK3  
444 in human cells may keep MLKL inactive [67]. This stresses the importance of developing  
445 alternative models to explore human proteins. Interestingly, the truncated MLKL(1-182)  
446 version was more active than full-length MLKL on yeast cells, even though MLKL does not  
447 undergo proteolysis for its activation in higher cells, unlike GSDMD. This stresses the idea  
448 that the C-terminal extension plays a regulatory role, as it does in GSDMD. The slight growth  
449 inhibition and cell death induced by MLKL and MLKL(PM) in yeast, compared to that of  
450 MLKL(1-182), may reflect either that the ability of the C-terminal pseudokinase extension of  
451 MLKL to block the interaction of its NTD with cellular membranes is less tight than in the  
452 case of GSDMD, or the existence of a phosphorylation-independent function for this protein  
453 [68]. Furthermore, contrary to what we observe for GSDMD, for which only the NTD alone  
454 forms aggregates detectable by immunoblot in non-reducing conditions, all MLKL different  
455 constructs aggregated, independently of their different ability to inhibit yeast growth. Some  
456 authors have claimed that MLKL exists as small oligomers under basal conditions that transit  
457 to high-order oligomers during necroptosis [69]. Our detection of aggregates may be  
458 consistent with this hypothesis.

459 These two pore-forming effector proteins mainly target the plasma membrane in higher  
460 eukaryotic cells, due to their capacity to interact with negatively charged phospholipids  
461 present in its inner layer, primarily phosphatidylserine and phosphoinositides such as  
462 phosphatidylinositol-4-phosphate and phosphatidylinositol-4,5-bisphosphate [4-6, 10]. In the  
463 yeast model, expression of the NTDs of both GSDMD and MLKL led to severe growth

464 inhibition and loss of viability. However, we were unable to detect the association of EGFP  
465 fusions of both NTDs with the plasma membrane. Moreover, as loss of viability did not  
466 correlate with loss of plasma membrane selective permeability, we could not conclude that  
467 cell lysis was the main cause of toxicity. We cannot discard that the absence of severe  
468 membrane damage is a consequence of the presence of the bulky GFP tag, as previously  
469 described [47], because the fusion of GSDMD(NT) to a smaller FLAG tag significantly  
470 increased uptake of the vital marker propidium iodide. In any case, our data hint that the  
471 yeast model may be especially useful to study the interference of the pyroptotic and  
472 necroptotic pore-forming effectors with cytoplasmic membranes, as we found here that  
473 growth inhibition relates to interference with trafficking and TORC1 signaling.

474 As a proof-of-principle that the yeast model can be used to titrate the self-assembly of human  
475 GSDMD(NT) monomers, we developed and studied point mutants in residues equivalent to  
476 those described in the literature as implicated in interactions between monomers or with  
477 membrane phospholipids in murine GSDMD [10, 11]. Mutation of key residues in interface I  
478 (L59G), interface II (F80D), and the phospholipid-interacting region (4A) abolished  
479 GSDMD(NT) activity, while mutation of the interface III (I90D) had a milder impact. The  
480 reproduction of these interactions *in vivo* in yeast constitutes the first proof to our knowledge  
481 that such interfaces of contact are functionally conserved between the human and mouse  
482 proteins. Besides, the localization of loss-of-function GSDMD(NT) mutants at the  
483 mitochondria reveal that, even when they lose their capacity to aggregate, they can interact  
484 with particular lipid membranes, arguing in favor of a model in which the interaction with the  
485 membranes precedes oligomerization [3, 14, 70], or at least oligomerization is not a pre-  
486 requisite for membrane interaction. Surprisingly, the 4A mutant, lacking basic residues  
487 presumably involved in electrostatic interactions with membranes [10], also showed  
488 colocalization with mitochondria, although the signal was fainter than for the other mutants.

489 At least two polybasic regions have been reported to be responsible for the interaction with  
490 phospholipids, which could explain this outcome when only one of them is mutated [11, 71].

491 GSDMD(NT) and MLKL(1-182) target yeast mitochondria, although we could only clearly  
492 colocalize MLKL(1-182) with this organelle. However, the fact that all loss-of-function  
493 GSDMD(NT) mutants colocalized with this structure in yeast strongly argues in favor of a  
494 direct association of GSDMD(NT) with mitochondrial membranes. The stronger  
495 fragmentation induced by WT GSDMD(NT) on yeast mitochondria as compared to MLKL(1-  
496 182) may be preventing the detection of this colocalization. Nevertheless, we cannot  
497 conclude that mitochondrial damage is a consequence of pore-forming activity. Previous  
498 studies have also reported a mitochondrial fragmentation effect in mammalian cells for both  
499 GSDMD(NT) and MLKL [6, 15-17, 19, 30]. The interaction between them and mitochondria  
500 is supported by the fact that they display a high affinity for cardiolipin [4-6, 10], although this  
501 lipid is present in the inner mitochondrial membrane and very scarce in the outer  
502 mitochondrial membrane [72]. Yeast cells show a slightly higher content of cardiolipin in  
503 mitochondria if compared to mammalian cells [73]. The first question that needs to be  
504 addressed is how these proteins reach the cardiolipin-rich membranes or which other lipids  
505 allow them to bind to the mitochondrial membrane. We tested the effects of cardiolipin  
506 removal in a *crd1Δ* yeast strain that lacks the cardiolipin synthase, the enzyme necessary  
507 for the synthesis of cardiolipin [72, 74], but we did not observe any changes in growth,  
508 localization, or mitochondrial damage (data not shown), so alternative mitochondrial outer  
509 membrane lipids might be involved.

510 Besides targeting mitochondria, both proteins seemed to impair endosomal traffic with some  
511 particularities: while GSDMD(NT) induced a mixed *vps*-type phenotype between class E and  
512 C (associated with a dysfunction of ESCRT and HOPS and complexes, respectively), MLKL  
513 induced a class C *vps* phenotype [64-66]. Our results suggest that each protein interferes

514 with a particular point of the endosomal pathway by interacting with a protein or lipid present  
515 at that stage. Moreover, both proteins blocked autophagic flux, which is not surprising, as  
516 the ESCRT complex is involved in autophagosome closure and the HOPS complex in the  
517 delivery of their cargo into the vacuole [62, 63]. Endosomes are highly dynamic  
518 compartments [75], which can explain why we could not colocalize GSDMD or MLKL NTDs  
519 with endosomal or vacuolar membranes by microscopy. Like in the case of mitochondria,  
520 we cannot discard that GSDMD and MLKL interact directly with yeast endosomal and/or  
521 vacuolar membranes, perturbing them or even forming pore-like structures. It is noteworthy  
522 that all the MLKL versions cause the same damage in endosomal traffic while their  
523 phenotype on growth, cell death, and subcellular distribution are different. This implies that  
524 additive factors must be involved in the toxicity achieved by MLKL(1-182) (see below).  
525 Different studies have reported a relationship between GSDMD/MLKL and vesicular  
526 transport. In a screening aimed at identifying GSDMD(NT) regulators, several genes  
527 associated with the endosomal and vacuolar organization were detected in macrophages  
528 [21]. Another study identified that several proteins related to lysosomal function and  
529 trafficking were up-regulated in GSDMD-deleted osteoclasts [22]. Besides, the ESCRT-III  
530 system, which seems to be affected in yeast by GSDMD(NT) expression, is necessary for  
531 the repair of the plasma membrane and downregulation of pyroptosis [76]. As for MLKL,  
532 different authors have claimed that this protein might induce or inhibit autophagy, play a role  
533 in the formation of intraluminal vesicles in the MVB or induce its exocytosis, although further  
534 studies should confirm these results [20, 27-30, 77]. Besides, the ESCRT-III system plays a  
535 similar role during necroptosis to that described in the case of GSDMD-induced pyroptosis  
536 in the repair of the plasma membrane [78, 79]. Our results may help to clarify the specific  
537 vesicular traffic compartment that is targeted by these proteins.

538 MLKL and GSDMD(NT) show affinity for phosphoinositides, preferentially for  
539 phosphatidylinositol-4-phosphate [PI(4)P] and phosphatidylinositol-4,5-*bis*phosphate  
540 [PI(4,5)P<sub>2</sub>], typical of the plasma membrane [10, 80, 81], also for phosphatidylinositol-3-  
541 phosphate [PI(3)P] and phosphatidylinositol-3,5-*bis*phosphate [PI(3,5)P<sub>2</sub>], which are present  
542 in yeast early and late endosomes, respectively [5, 22]. As the concentration of PI(3)P and  
543 PI(3,5)P<sub>2</sub> is higher in yeast endosomal compartments compared to those of mammalian  
544 cells [73], GSDMD and MLKL might be hijacked to endosomal vesicles in yeast, preventing  
545 them from localizing at the plasma membrane. Also, a blockade of trafficking caused by their  
546 presence could inhibit their own transport of pre-assembled aggregates to the plasma  
547 membrane by exocytosis. In any case, the differences in vesicle content and composition  
548 among the different types of mammalian cells might explain some of the controversies that  
549 have arisen on this subject.

550 An interesting finding is that the NTDs of pyroptotic and necroptotic effectors trigger TORC1  
551 inhibition in yeast. Furthermore, our data suggest that loss of viability relies on cell cycle  
552 arrest as a consequence of TORC1 inhibition and the uncoupling of autophagy, rather than  
553 on cell lysis or organellar damage. Recent studies have established a link between GSDMD  
554 and pyroptosis to the mammalian TORC1 (mTORC1) pathway. Evavold *et al.* [21] showed  
555 that mTORC1 activity is necessary for the generation of ROS that drive GSDMD(NT)  
556 oligomerization. Other studies relate GSDMD activation by Caspase-8 to the Ragulator  
557 complex, the activator of mTORC1 [82, 83]. In our setting, our main hypothesis is that  
558 inhibition of TORC1 by both GSDMD(NT) and MLKL(1-182) is a consequence of the  
559 perturbation of the endosomal traffic rather than a direct interaction of GSDMD or MLKL with  
560 yeast TORC1 or any of its regulators. Vesicular traffic is involved in the interaction of TORC1  
561 with both its activators and its substrates [58, 59, 61]. Recently, it was reported that there  
562 are two co-existing pools of TORC1 in yeast cells that regulate independent pathways.

563 TORC1 located at the endosomes controls autophagy through Atg13 phosphorylation, while  
564 TORC1 located at the vacuolar membrane controls cell cycle progression through Sch9  
565 phosphorylation [84]. Besides, a third pool of TORC1 is responsible for directly  
566 phosphorylating Maf1 within the nucleus to regulate RNA polymerase III, although it can also  
567 be phosphorylated by Sch9 [51, 53, 54]. Interestingly, although both GSDMD(NT) and  
568 MLKL(1-182) impaired cell cycle progression, they did not have the same impact on TORC1  
569 activity: GSDMD(NT) caused a decrease in the phosphorylation of Sch9, Atg13, and Maf1,  
570 implying all TORC1 pools are affected; while MLKL(1-182) only affected Sch9 signaling,  
571 implying that only the TORC1 pool located at the vacuolar membrane is affected. It would  
572 be interesting to assess if these differences are associated with the distinct effect of  
573 GSDMD(NT) and MLKL(1-182) on endosomal traffic; and why MLKL and MLKL(PM),  
574 despite having a similar effect on endosomal traffic, did not affect TORC1 signaling  
575 significantly. It should not be overlooked that full-length MLKL, but not the NTD alone, induce  
576 proteostatic stress in the yeast cell, which may contribute for its distinct behavior. The tighter  
577 TORC1 inhibition caused by GSDMD(NT) might explain why this protein causes a more  
578 severe effect on cell growth and viability, whereas the more efficient inhibition of HOPS by  
579 MLKL may account for its more efficient impairment of autophagy. In any case, these results  
580 add evidence to the idea that GSDMD and MLKL might play roles in human cells beyond  
581 cell death, related to trafficking and response to nutrient or oxidative stress.

582 To summarize, we provide evidence that *S. cerevisiae* can be exploited as a model to study  
583 the effectors of pyroptosis and necroptosis, to deepen the molecular mechanisms of these  
584 proteins and the interaction between monomers. In our model, the NTDs of human GSDMD  
585 and MLKL are toxic to yeast cells because they form aggregates that affect mitochondria,  
586 endosomal traffic, autophagy, and cell cycle progression. Understanding its limitations, this



587 model can be advantageous in future studies to identify new targets, perform structure-  
588 function assays, and eventually, test drugs that modulate their activity.

## 589 **Materials and methods**

### 590 **Strains, media, and growth conditions**

591 The BY4741 *S. cerevisiae* strain (*MAT $\alpha$  his3 $\Delta$ 1 leu2 $\Delta$ 0 met15 $\Delta$ 0 ura3 $\Delta$ 0*) or its (BY4741  
592 *trp1 $\Delta$ ::NatMX6* derivative (a gift from Á. Sellers-Moya, Complutense University of Madrid,  
593 Spain) [85] were used in all experiments unless otherwise stated. MVY04 strain (isogenic to  
594 BY4741, *VPH1-GFP-URA3*) was used to visualize the vacuolar membrane [39]. MVY07  
595 strain (isogenic to BY4741, *HSP104-mCherry::KanMX*) was used to visualize Hsp104 and  
596 was obtained by amplifying *mCherry-KanMX* from the plasmid pAP17 (a gift from Jeremy  
597 Thorner, University of California, CA, USA), using primers Hsp104\_mCh\_Fw and  
598 Hsp104\_mCh\_Rv, and integrating the product in *HSP104* genomic locus. See Table 1 for  
599 primer sequences. The *Escherichia coli* DH5 $\alpha$  strain was used for routine molecular biology  
600 techniques.

601 Synthetic dextrose (SD) medium contained 2% glucose (ITW reagents), 0.17% yeast  
602 nitrogen base without amino acids (BD Difco), 0.5% ammonium sulfate (ITW reagents), and  
603 0.12% synthetic amino acid drop-out mixture (Formedium), lacking appropriate amino acids  
604 and nucleic acid bases to maintain selection for plasmids. For synthetic galactose (SG) and  
605 synthetic raffinose (SR) media, glucose was replaced with 2% (w/v) galactose (ITW  
606 reagents) or 1.5% (w/v) raffinose (VWR), respectively. *GAL1*-driven protein induction in  
607 liquid medium was performed by growing cells in SR to mid-exponential phase and then  
608 refreshing the cultures to an OD600 of 0.3 directly with SG lacking the appropriate amino  
609 acids to maintain selection for plasmids for 5 h unless otherwise stated. Yeast strains were  
610 incubated at 30 °C.

## 611 **Plasmids**

612 Transformation of *E. coli* and *S. cerevisiae* and other basic molecular biology methods were  
613 carried out using standard procedures.

614 *GSDMD* and *GSDMD(NT)* genes were amplified by standard PCR from pDB-His-MBP-  
615 *GSDMD* FL (a gift from J. Kagan, Boston Children's Hospital, MA, USA) using primers  
616 *GSDMD\_Fw* and *GSDMD\_Rv2* for the first, and *GSDMD\_Fw* and *NGSDMD\_Rv* for the  
617 second, all designed with *attB* flanking sites. *GSDMD-FLAG* and *GSDMD(NT)-FLAG*  
618 constructions were obtained by standard PCR from pDB-His-MBP-*GSDMD* FL using  
619 primers *GSDMD\_Fw* and *GSDMD\_FLAG\_Rv* for the first, and *GSDMD\_Fw* and  
620 *NGSDMD\_FLAG\_Rv* for the second, all designed with *attB* flanking sites. *GSDMD*  
621 *R137A/K145A/R151A/R153A(NT)* mutant, referred to as *GSDMD(NT)* 4A, was amplified by  
622 standard PCR from pDB-His-MBP-*GSDMD* 4A FL (a gift from J. Kagan, Boston Children's  
623 Hospital, MA, USA) using the same primers as for the wild-type gene. *MLKL* gene and its  
624 truncated version *MLKL(1-182)* were amplified by standard PCR from pRetrX-TRE3G-  
625 h*MLKL*-Venus (Addgene\_106078) using primers *MLKL\_Fw* and *MLKL\_Rv* for the first, and  
626 *MLKL\_Fw* and *MLKL 1-182\_Rv* for the second. See Table 1 for primer sequences. The *attB*-  
627 flanked PCR products were cloned into pDONR221 vector by Gateway BP Clonase II  
628 reaction (Invitrogen) to generate entry clones. Subsequently, the inserts from the entry  
629 clones were subcloned into pAG413-GAL-ccdB-EGFP/DsRed, pAG415-GAL-ccdB, or  
630 pAG416-GAL-ccdB-EGFP vectors (Addgene\_100000011) [86] by Gateway LR Clonase II  
631 reaction (Invitrogen), generating the plasmids pAG413-*GSDMD*-EGFP/DsRed, pAG413-  
632 *GSDMD(NT)*-EGFP/DsRed, pAG413-*MLKL*-EGFP/DsRed, and pAG413-*MLKL(1-182)*-  
633 EGFP/DsRed, pAG415-*GSDMD-FLAG*, pAG415-*GSDMD(NT)-FLAG*, pGA415-  
634 *GSDMD(NT)* 4A-*FLAG* pAG416-*GSDMD*-EGFP, pAG416-*GSDMD(NT)*-EGFP, pAG416-  
635 *GSDMD(NT)* 4A -EGFP, pAG416-*MLKL*-EGFP, and pAG416-*MLKL(1-182)*-EGFP. All the

636 proteins were tagged in C-terminal, with a 17-amino acid linker (MVSKGEELFTGVVPIV)  
637 due to the characteristics of Gateway Cloning system. Only in -FLAG constructs the tag was  
638 fused immediately after the protein.

639 MLKL(PM), GSDMD A377D, and GSDMD(NT) L59G, I80D or I90D mutants were obtained  
640 by site-directed mutagenesis performed on their respective wild-type entry clone, using  
641 primers PmMLKL\_Fw, PmMLKL\_Rv, A377D\_Fw, A377D\_Rv, L59G\_Fw, L59G\_Rv,  
642 F80D\_Fw, F80D\_Rv, I90D\_Fw, and I90D\_Rv, respectively. Primers are listed in Table 1.  
643 Subsequently, the inserts from the entry clone were subcloned into pAG413-GAL-ccdB-  
644 EGFP/DsRed, pAG415-GAL-ccdB, and pAG416-GAL-ccdB-EGFP plasmids by Gateway LR  
645 Clonase II reaction, generating the plasmids pAG413-MLKL(PM)-EGFP/DsRed, pAG415-  
646 GSDMD(NT) L59G, F80D, or I90D-FLAG, pAG416-MLKL(PM)-EGFP, pAG416-GSDMD  
647 A377D-EGFP, and pAG416-GSDMD(NT) L59G, F80D, or I90D-EGFP. As stated above, all  
648 the proteins were tagged at their C-terminal ends.

649 pJU676 (pRS416-Sch9-5xHA) and pAH099 (pRS416-MAF1-3xHA) plasmids, used as a  
650 readout for TORC1 activity, were a gift from R. Loewith, University of Geneva, Switzerland  
651 [50]. HC078 (pRS315-3xHA-Atg13) plasmid, used also as a readout of TORC1 activity, was  
652 obtained from Addgene (Addgene\_ 59544). The autophagic marker Atg8-GFP, encoded in  
653 the plasmid pRS314-GFP-Atg8, was a gift from Y. Ohsumi, Tokyo Institute of Technology,  
654 Japan [87]. The mitochondrial marker llv6-mCherry, encoded in the plasmid pOB06 was a  
655 gift from Ó. A. Barbero, Complutense University of Madrid, Spain.

## 656 **Western blotting assays**

657 Western blotting assays were carried out by standard techniques in 10% acrylamide (ITW  
658 reagents) gels [39]. Non-reducing western blots were performed by removing dithiothreitol  
659 (DTT) from the sample buffer and using 7.5% acrylamide gels. Assessment of Sch9

660 phosphorylation was adapted from Péli-Gulli *et al.* [88]. Twenty mL of cell culture were mixed  
661 with trichloroacetic acid (TCA) (Sigma-Aldrich) at a final concentration of 6% and incubated  
662 in ice for 10 min. After centrifugation, the pellet was washed with ice-cold acetone and dried  
663 in a SpeedVac SC100 (Savant). The pellet was resuspended in a volume of urea buffer [50  
664 mM Tris-HCl pH 7.5 (Fisher BioReagents), 6 M urea (Merck), 1% sodium dodecyl sulfate  
665 (SDS) (Duchefa Biochemie), 50mM NaF (Probus), and 1mM phenylmethanesulfonyl fluoride  
666 (PMSF) (Amresco) proportional to the OD<sub>600nm</sub> of the cell culture. Cells were disrupted by  
667 bead beating with FastPrep24 (MP Biomedicals). Subsequently, 2X sample buffer was  
668 added [120 mM Tris-HCl pH 6.8, 20% glycerol (ITW Reagents), 200 mM DTT (Acros), 4%  
669 SDS] and the mix was boiled at 60°C for 10 minutes. Proteins were resolved by SDS-PAGE  
670 in 7.5% acrylamide gels and transferred onto nitrocellulose membranes for 1 h 30 min at 80  
671 V.

672 Mouse anti-GFP (BD Biosciences JL-8, 1:1,000 dilution) and anti-HA (Sigma-Aldrich 12CA5,  
673 1:1,000 dilution) were used as primary antibodies to detect the expression of proteins fused  
674 to GFP and HA, respectively. Rabbit anti-glucose-6-phosphate dehydrogenase (G6PDH)  
675 antibody (Sigma-Aldrich, 1:50,000 dilution) was used as a loading control. Anti-rabbit IgG-  
676 IRDye 800CW (LI-COR Biosciences), anti-rabbit IgG-IRDye 680LT (LI-COR Biosciences),  
677 anti-mouse IgG-IRDye 800CW (LI-COR Biosciences), anti-mouse IG-IRDye 680LT (LI-COR  
678 Biosciences), all at 1:5,000 dilution, were used as secondary antibodies. Odyssey XF  
679 Imaging System (LI-COR Biosciences) or ChemiDoc MP Imaging System (Bio-Rad) were  
680 used for developing the immunoblots.

### 681 **Spot growth assays**

682 Spot growth assays on plates were performed by incubating transformant clones overnight  
683 in SR media, adjusting the culture to an OD<sub>600</sub> of 0.5, and spotting samples in four serial 10-

684 fold dilutions onto the surface of SD or SG plates lacking the appropriate amino acids to  
685 maintain selection for plasmids, followed by incubation at 30 °C for 2-3 days.

## 686 **Microscopy techniques**

687 For *in vivo* bright field differential interference contrast (DIC) microscopy or fluorescence  
688 microscopy, cells were cultured as previously stated, harvested by centrifugation at 3,000  
689 rpm for 3 min, and viewed directly on the microscope. Cells were examined with an Eclipse  
690 TE2000U microscope (Nikon) using the appropriate sets of filters. Digital images were  
691 acquired with an Orca-ER camera controller (Hamamatsu) and were processed with the  
692 HCLImage software.

693 Observation of actin in yeast cells with Rd-conjugated phalloidin (Invitrogen) was performed  
694 as previously described [39]. For FM4-64 (Invitrogen) vital staining, cells were cultured as  
695 previously stated, harvested by centrifugation, and resuspended in synthetic medium. Cells  
696 were labeled with 2.4  $\mu$ M FM4-64, incubated for 1 h 15 min at 30 °C with shaking, washed  
697 in FACSFlow™ Sheath Fluid (BD Biosciences), and observed by fluorescence microscopy.

698 For confocal microscopy, cells were cultured as previously stated, harvested by  
699 centrifugation, and fixed with a 4% p-formaldehyde (ITW Reagents), and 3.4% sucrose (ITW  
700 Reagents) solution for 15 min at room temperature. Then cells were washed and  
701 resuspended in FACSFlow™ Sheath Fluid. Coverslips were treated with 5  $\mu$ L of  
702 concanavalin A (Sigma-Aldrich) and dried at room temperature. Adhesion of cells was  
703 performed by adding 7  $\mu$ L of fixed cells over concanavalin A-treated coverslips and  
704 incubating for 30 min. ProLong™ Glass Antifade Mountant (ThermoFisher  
705 Scientific)/Glycerol (1:1) was used to avoid photobleaching. Cells were examined with an  
706 Olympus IX83 Automated Fluorescence Microscope, coupled to Olympus FV1200 confocal

707 system, using the appropriate set of filters. Images were processed to remove background  
708 and enhance contrast. Images were analyzed using Fiji and Adobe Photoshop.

### 709 **Flow cytometry**

710 Cells were cultured as previously stated. After 5h of galactose induction, cell death  
711 measurement by PI (Sigma-Aldrich) staining was performed as previously described [39].  
712 For cell cycle analysis,  $1.5 \times 10^7$  cells were harvested, fixed, and permeabilized with 70%  
713 ethanol overnight for each sample. Then samples were treated at 37 °C for 2 h with 500  $\mu$ L  
714 of RNase A (Roche) 2 mg/mL and after 30 min with 200  $\mu$ L of pepsin (Sigma-Aldrich) 10  
715 mg/mL. DNA was stained by the addition of 0.0005% PI in FACScan™ Sheath Fluid.

716 Cells were analyzed using a FACScan (Becton Dickinson) flow cytometer through a 585/42  
717 BP emission filter (FL2) for PI. At least 10,000 cells were analyzed for each experiment.  
718 Data were processed using FlowJo software.

### 719 **Cell viability assay**

720 Cells were cultured as previously stated. After 5 h of galactose induction, cell viability was  
721 measured by the microcolonies method, as described before [39, 89].

### 722 **Statistical analysis**

723 Data were analyzed using RStudio, ggplot2, dplyr, tidyverse, ggrepel, openxlsx, ggthemes,  
724 ggsignif, gridExtra, and Origin software. All data sets were tested for normality using the  
725 Shapiro-Wilkinson test. When a normal distribution was confirmed, a One-Way ANOVA test  
726 with a *post hoc* Tukey's HSD test was used for statistical comparison between multiple  
727 groups. For data sets that did not show normality, a Kruskal-Wallis test with a *post hoc*  
728 Dunn's test was applied. The asterisks (\*, \*\*, \*\*\*) in the figures correspond to a p-value of  
729 <0.05, <0.01, and <0.001, respectively. Experiments were performed as biological triplicates

730 on different clones and data with error bars are represented as mean  $\pm$  standard deviation  
731 (SD).

### 732 **Structure analysis**

733 The schemes of GSDMD and MLKL structure were generated using Illustrator for Biological  
734 Sequences (IBS) [90]. The alignment of GSDMD sequences was done using the Clustal  
735 Omega (EMBL-EBI). The 3D projections of GSDM3A were built using PyMOL.

### 736 **Acknowledgments**

737 We thank Á. Sellers-Moya, Ó. A. Barbero, R. Loewith, J. Thorner, and Y. Ohsumi for  
738 materials; and J. Kagan for materials and useful discussion; C. Mazzoni, C. Evavold, and  
739 our colleagues at Research Unit 3 for their support and discussion; and L. Sastre for  
740 technical support. M. V. was supported by a predoctoral contract from Universidad  
741 Complutense de Madrid. We thank the Genomics Unit (Genomics and Proteomics Center,  
742 UCM) for their help with the sequencing reactions, the Confocal and Multiphoton Microscopy  
743 Unit (Cytometry and Fluorescence Microscopy Center, UCM) for their help with the confocal  
744 microscopy experiments, and the Flow Cytometry Unit (Cytometry and Fluorescence  
745 Microscopy Center, UCM) for their help with the flow cytometry experiments. This research  
746 was possible thanks to funding from Grant PID2019-105342GB-I00 from Ministerio de  
747 Ciencia e Innovación (Spain) to M. M. and V. J. C.

### 748 **Author contribution**

749 M. V.: Conceptualization, Methodology, Validation, Formal analysis, Investigation, Writing –  
750 original draft, and Visualization. M. M. and V. J. C.: Conceptualization, Methodology,  
751 Resources, Writing – Review & Editing, Supervision, Project administration, and Funding  
752 acquisition.

753 **Declaration of interests**

754 The authors declare no competing interests.

755 **References**

- 756 1. Frank D, Vince JE. Pyroptosis versus necroptosis: similarities, differences, and  
757 crosstalk. *Cell Death Differ.* 2019;26(1):99-114. Epub 2018/10/21. doi: 10.1038/s41418-  
758 018-0212-6. PubMed PMID: 30341423; PubMed Central PMCID: PMC6294779.
- 759 2. Bedoui S, Herold MJ, Strasser A. Emerging connectivity of programmed cell death  
760 pathways and its physiological implications. *Nat Rev Mol Cell Biol.* 2020;21(11):678-95.  
761 Epub 2020/09/03. doi: 10.1038/s41580-020-0270-8. PubMed PMID: 32873928.
- 762 3. Sborgi L, Ruhl S, Mulvihill E, Pipercevic J, Heilig R, Stahlberg H, et al. GSDMD  
763 membrane pore formation constitutes the mechanism of pyroptotic cell death. *EMBO J.*  
764 2016;35(16):1766-78. Epub 2016/07/16. doi: 10.15252/embj.201694696. PubMed PMID:  
765 27418190; PubMed Central PMCID: PMC5010048.
- 766 4. Ding J, Wang K, Liu W, She Y, Sun Q, Shi J, et al. Pore-forming activity and  
767 structural autoinhibition of the gasdermin family. *Nature.* 2016;535(7610):111-6. Epub  
768 2016/06/10. doi: 10.1038/nature18590. PubMed PMID: 27281216.
- 769 5. Dondelinger Y, Declercq W, Montessuit S, Roelandt R, Goncalves A, Bruggeman I,  
770 et al. MLKL compromises plasma membrane integrity by binding to phosphatidylinositol  
771 phosphates. *Cell Rep.* 2014;7(4):971-81. Epub 2014/05/13. doi:  
772 10.1016/j.celrep.2014.04.026. PubMed PMID: 24813885.
- 773 6. Wang H, Sun L, Su L, Rizo J, Liu L, Wang LF, et al. Mixed lineage kinase domain-  
774 like protein MLKL causes necrotic membrane disruption upon phosphorylation by RIP3.  
775 *Mol Cell.* 2014;54(1):133-46. Epub 2014/04/08. doi: 10.1016/j.molcel.2014.03.003.  
776 PubMed PMID: 24703947.



- 777 7. Flores-Romero H, Ros U, Garcia-Saez AJ. Pore formation in regulated cell death.  
778 EMBO J. 2020;39(23):e105753. Epub 2020/10/31. doi: 10.15252/emboj.2020105753.  
779 PubMed PMID: 33124082; PubMed Central PMCID: PMC7705454.
- 780 8. Broz P, Dixit VM. Inflammasomes: mechanism of assembly, regulation and  
781 signalling. Nat Rev Immunol. 2016;16(7):407-20. Epub 2016/06/14. doi:  
782 10.1038/nri.2016.58. PubMed PMID: 27291964.
- 783 9. Kagan JC, Magupalli VG, Wu H. SMOCs: supramolecular organizing centres that  
784 control innate immunity. Nat Rev Immunol. 2014;14(12):821-6. Epub 2014/11/02. doi:  
785 10.1038/nri3757. PubMed PMID: 25359439; PubMed Central PMCID: PMC4373346.
- 786 10. Liu X, Zhang Z, Ruan J, Pan Y, Magupalli VG, Wu H, et al. Inflammasome-  
787 activated gasdermin D causes pyroptosis by forming membrane pores. Nature.  
788 2016;535(7610):153-8. Epub 2016/07/08. doi: 10.1038/nature18629. PubMed PMID:  
789 27383986; PubMed Central PMCID: PMC5539988.
- 790 11. Liu Z, Wang C, Yang J, Zhou B, Yang R, Ramachandran R, et al. Crystal  
791 Structures of the Full-Length Murine and Human Gasdermin D Reveal Mechanisms of  
792 Autoinhibition, Lipid Binding, and Oligomerization. Immunity. 2019;51(1):43-9 e4. Epub  
793 2019/05/18. doi: 10.1016/j.immuni.2019.04.017. PubMed PMID: 31097341; PubMed  
794 Central PMCID: PMC6640092.
- 795 12. Shi J, Zhao Y, Wang Y, Gao W, Ding J, Li P, et al. Inflammatory caspases are  
796 innate immune receptors for intracellular LPS. Nature. 2014;514(7521):187-92. doi:  
797 10.1038/nature13683.
- 798 13. Shi J, Zhao Y, Wang K, Shi X, Wang Y, Huang H, et al. Cleavage of GSDMD by  
799 inflammatory caspases determines pyroptotic cell death. Nature. 2015;526(7575):660-5.  
800 Epub 2015/09/17. doi: 10.1038/nature15514. PubMed PMID: 26375003.
- 801 14. Mulvihill E, Sborgi L, Mari SA, Pfreundschuh M, Hiller S, Muller DJ. Mechanism of  
802 membrane pore formation by human gasdermin-D. EMBO J. 2018;37(14). Epub

803 2018/06/15. doi: 10.15252/embj.201798321. PubMed PMID: 29898893; PubMed Central  
804 PMCID: PMCPMC6043855.

805 15. de Vasconcelos NM, Van Opdenbosch N, Van Gorp H, Parthoens E, Lamkanfi M.  
806 Single-cell analysis of pyroptosis dynamics reveals conserved GSDMD-mediated  
807 subcellular events that precede plasma membrane rupture. *Cell Death Differ.*  
808 2019;26(1):146-61. Epub 2018/04/19. doi: 10.1038/s41418-018-0106-7. PubMed PMID:  
809 29666477; PubMed Central PMCID: PMCPMC6294780.

810 16. de Torre-Minguela C, Gomez AI, Couillin I, Pelegrin P. Gasdermins mediate  
811 cellular release of mitochondrial DNA during pyroptosis and apoptosis. *FASEB J.*  
812 2021;35(8):e21757. Epub 2021/07/08. doi: 10.1096/fj.202100085R. PubMed PMID:  
813 34233045.

814 17. Huang LS, Hong Z, Wu W, Xiong S, Zhong M, Gao X, et al. mtDNA Activates  
815 cGAS Signaling and Suppresses the YAP-Mediated Endothelial Cell Proliferation Program  
816 to Promote Inflammatory Injury. *Immunity.* 2020;52(3):475-86 e5. Epub 2020/03/14. doi:  
817 10.1016/j.immuni.2020.02.002. PubMed PMID: 32164878; PubMed Central PMCID:  
818 PMCPMC7266657.

819 18. Weindel CG, Martinez EL, Zhao X, Mabry CJ, Bell SL, Vail KJ, et al. Mitochondrial  
820 ROS promotes susceptibility to infection via gasdermin D-mediated necroptosis. *Cell.*  
821 2022;185(17):3214-31 e23. Epub 2022/07/31. doi: 10.1016/j.cell.2022.06.038. PubMed  
822 PMID: 35907404; PubMed Central PMCID: PMCPMC9531054.

823 19. Platnich JM, Chung H, Lau A, Sandall CF, Bondzi-Simpson A, Chen HM, et al.  
824 Shiga Toxin/Lipopolysaccharide Activates Caspase-4 and Gasdermin D to Trigger  
825 Mitochondrial Reactive Oxygen Species Upstream of the NLRP3 Inflammasome. *Cell Rep.*  
826 2018;25(6):1525-36 e7. Epub 2018/11/08. doi: 10.1016/j.celrep.2018.09.071. PubMed  
827 PMID: 30404007.

- 828 20. Karmakar M, Minns M, Greenberg EN, Diaz-Aponte J, Pestonjamas K, Johnson  
829 JL, et al. N-GSDMD trafficking to neutrophil organelles facilitates IL-1beta release  
830 independently of plasma membrane pores and pyroptosis. *Nat Commun.* 2020;11(1):2212.  
831 Epub 2020/05/07. doi: 10.1038/s41467-020-16043-9. PubMed PMID: 32371889; PubMed  
832 Central PMCID: PMCPMC7200749.
- 833 21. Evavold CL, Hafner-Bratkovic I, Devant P, D'Andrea JM, Ngwa EM, Borsic E, et al.  
834 Control of gasdermin D oligomerization and pyroptosis by the Regulator-Rag-mTORC1  
835 pathway. *Cell.* 2021;184(17):4495-511 e19. Epub 2021/07/22. doi:  
836 10.1016/j.cell.2021.06.028. PubMed PMID: 34289345; PubMed Central PMCID:  
837 PMCPMC8380731.
- 838 22. Li M, Yang D, Yan H, Tang Z, Jiang D, Zhang J, et al. Gasdermin D maintains bone  
839 mass by rewiring the endo-lysosomal pathway of osteoclastic bone resorption. *Dev Cell.*  
840 2022;57(20):2365-80 e8. Epub 2022/10/16. doi: 10.1016/j.devcel.2022.09.013. PubMed  
841 PMID: 36243012.
- 842 23. Dhuriya YK, Sharma D. Necroptosis: a regulated inflammatory mode of cell death.  
843 *J Neuroinflammation.* 2018;15(1):199. Epub 2018/07/08. doi: 10.1186/s12974-018-1235-0.  
844 PubMed PMID: 29980212; PubMed Central PMCID: PMCPMC6035417.
- 845 24. Murphy JM, Czabotar PE, Hildebrand JM, Lucet IS, Zhang JG, Alvarez-Diaz S, et  
846 al. The pseudokinase MLKL mediates necroptosis via a molecular switch mechanism.  
847 *Immunity.* 2013;39(3):443-53. Epub 2013/09/10. doi: 10.1016/j.immuni.2013.06.018.  
848 PubMed PMID: 24012422.
- 849 25. Yang Y, Xie E, Du L, Yang Y, Wu B, Sun L, et al. Positive Charges in the Brace  
850 Region Facilitate the Membrane Disruption of MLKL-NTR in Necroptosis. *Molecules.*  
851 2021;26(17). Epub 2021/09/11. doi: 10.3390/molecules26175194. PubMed PMID:  
852 34500630; PubMed Central PMCID: PMCPMC8433767.

- 853 26. Hildebrand JM, Tanzer MC, Lucet IS, Young SN, Spall SK, Sharma P, et al.  
854 Activation of the pseudokinase MLKL unleashes the four-helix bundle domain to induce  
855 membrane localization and necroptotic cell death. *Proceedings of the National Academy of*  
856 *Sciences*. 2014;111(42):15072-7. doi: doi:10.1073/pnas.1408987111.
- 857 27. Yoon S, Kovalenko A, Bogdanov K, Wallach D. MLKL, the Protein that Mediates  
858 Necroptosis, Also Regulates Endosomal Trafficking and Extracellular Vesicle Generation.  
859 *Immunity*. 2017;47(1):51-65 e7. Epub 2017/07/02. doi: 10.1016/j.immuni.2017.06.001.  
860 PubMed PMID: 28666573.
- 861 28. Wu X, Poulsen KL, Sanz-Garcia C, Huang E, McMullen MR, Roychowdhury S, et  
862 al. MLKL-dependent signaling regulates autophagic flux in a murine model of non-alcohol-  
863 associated fatty liver and steatohepatitis. *J Hepatol*. 2020;73(3):616-27. Epub 2020/03/30.  
864 doi: 10.1016/j.jhep.2020.03.023. PubMed PMID: 32220583; PubMed Central PMCID:  
865 PMCPMC7438259.
- 866 29. Frank D, Vaux DL, Murphy JM, Vince JE, Lindqvist LM. Activated MLKL attenuates  
867 autophagy following its translocation to intracellular membranes. *J Cell Sci*. 2019;132(5).  
868 Epub 2019/02/03. doi: 10.1242/jcs.220996. PubMed PMID: 30709919.
- 869 30. Samson AL, Garnish SE, Hildebrand JM, Murphy JM. Location, location, location: A  
870 compartmentalized view of TNF-induced necroptotic signaling. *Sci Signal*. 2021;14(668).  
871 Epub 2021/02/04. doi: 10.1126/scisignal.abc6178. PubMed PMID: 33531383.
- 872 31. Botstein D, Fink GR. Yeast: an experimental organism for modern biology.  
873 *Science*. 1988;240(4858):1439-43. Epub 1988/06/10. PubMed PMID: 3287619.
- 874 32. Botstein D, Fink GR. Yeast: an experimental organism for 21st Century biology.  
875 *Genetics*. 2011;189(3):695-704. Epub 2011/11/16. doi: 10.1534/genetics.111.130765.  
876 PubMed PMID: 22084421; PubMed Central PMCID: PMCPMC3213361.
- 877 33. Kachroo AH, Laurent JM, Yellman CM, Meyer AG, Wilke CO, Marcotte EM.  
878 *Evolution*. Systematic humanization of yeast genes reveals conserved functions and

- 879 genetic modularity. *Science*. 2015;348(6237):921-5. Epub 2015/05/23. doi:  
880 10.1126/science.aaa0769. PubMed PMID: 25999509; PubMed Central PMCID:  
881 PMCPMC4718922.
- 882 34. Kachroo AH, Vandelloo M, Greco BM, Abdullah M. Humanized yeast to model  
883 human biology, disease and evolution. *Dis Model Mech*. 2022;15(6). Epub 2022/06/07.  
884 doi: 10.1242/dmm.049309. PubMed PMID: 35661208; PubMed Central PMCID:  
885 PMCPMC9194483.
- 886 35. Boonekamp FJ, Knibbe E, Vieira-Lara MA, Wijsman M, Luttik MAH, van Eunen K,  
887 et al. Full humanization of the glycolytic pathway in *Saccharomyces cerevisiae*. *Cell Rep*.  
888 2022;39(13):111010. Epub 2022/06/30. doi: 10.1016/j.celrep.2022.111010. PubMed  
889 PMID: 35767960.
- 890 36. Laurent JM, Young JH, Kachroo AH, Marcotte EM. Efforts to make and apply  
891 humanized yeast. *Brief Funct Genomics*. 2016;15(2):155-63. Epub 2015/10/16. doi:  
892 10.1093/bfpg/elv041. PubMed PMID: 26462863; PubMed Central PMCID:  
893 PMCPMC4803062.
- 894 37. Coronas-Serna JM, Valenti M, del Val E, Fernández-Acero T, Rodríguez-Escudero  
895 I, Mingo J, et al. Modeling human disease in yeast: recreating the PI3K-PTEN-Akt  
896 signaling pathway in *Saccharomyces cerevisiae*. *Int Microbiol*. 2020;23(1):75-87. doi:  
897 10.1007/s10123-019-00082-4.
- 898 38. Carmona-Gutierrez D, Bauer MA, Zimmermann A, Aguilera A, Austriaco N,  
899 Ayscough K, et al. Guidelines and recommendations on yeast cell death nomenclature.  
900 *Microb Cell*. 2018;5(1):4-31. Epub 2018/01/23. doi: 10.15698/mic2018.01.607. PubMed  
901 PMID: 29354647; PubMed Central PMCID: PMCPMC5772036.
- 902 39. Valenti M, Molina M, Cid VJ. Heterologous Expression and Auto-Activation of  
903 Human Pro-Inflammatory Caspase-1 in *Saccharomyces cerevisiae* and Comparison to  
904 Caspase-8. *Front Immunol*. 2021;12:668602. Epub 2021/08/03. doi:

905 10.3389/fimmu.2021.668602. PubMed PMID: 34335569; PubMed Central PMCID:  
906 PMCPMC8317575.

907 40. Ji Y, Ward LA, Hawkins CJ. Reconstitution of Human Necrosome Interactions in  
908 *Saccharomyces cerevisiae*. *Biomolecules*. 2021;11(2). Epub 2021/01/29. doi:  
909 10.3390/biom11020153. PubMed PMID: 33503908; PubMed Central PMCID:  
910 PMCPMC7911209.

911 41. Sun L, Wang H, Wang Z, He S, Chen S, Liao D, et al. Mixed lineage kinase  
912 domain-like protein mediates necrosis signaling downstream of RIP3 kinase. *Cell*.  
913 2012;148(1-2):213-27. Epub 2012/01/24. doi: 10.1016/j.cell.2011.11.031. PubMed PMID:  
914 22265413.

915 42. Rodriguez DA, Weinlich R, Brown S, Guy C, Fitzgerald P, Dillon CP, et al.  
916 Characterization of RIPK3-mediated phosphorylation of the activation loop of MLKL during  
917 necroptosis. *Cell Death Differ*. 2016;23(1):76-88. Epub 2015/05/30. doi:  
918 10.1038/cdd.2015.70. PubMed PMID: 26024392; PubMed Central PMCID:  
919 PMCPMC4815980.

920 43. Petrie EJ, Sandow JJ, Jacobsen AV, Smith BJ, Griffin MDW, Lucet IS, et al.  
921 Conformational switching of the pseudokinase domain promotes human MLKL  
922 tetramerization and cell death by necroptosis. *Nat Commun*. 2018;9(1):2422. Epub  
923 2018/06/23. doi: 10.1038/s41467-018-04714-7. PubMed PMID: 29930286; PubMed  
924 Central PMCID: PMCPMC6013482.

925 44. Quarato G, Guy CS, Grace CR, Llambi F, Nourse A, Rodriguez DA, et al.  
926 Sequential Engagement of Distinct MLKL Phosphatidylinositol-Binding Sites Executes  
927 Necroptosis. *Mol Cell*. 2016;61(4):589-601. Epub 2016/02/09. doi:  
928 10.1016/j.molcel.2016.01.011. PubMed PMID: 26853145; PubMed Central PMCID:  
929 PMCPMC4769881.

- 930 45. Coronas-Serna JM, Del Val E, Kagan JC, Molina M, Cid VJ. Heterologous  
931 Expression and Assembly of Human TLR Signaling Components in *Saccharomyces*  
932 *cerevisiae*. *Biomolecules*. 2021;11(11). Epub 2021/11/28. doi: 10.3390/biom11111737.  
933 PubMed PMID: 34827735; PubMed Central PMCID: PMC8615643.
- 934 46. Saarikangas J, Barral Y. Protein aggregation as a mechanism of adaptive cellular  
935 responses. *Curr Genet*. 2016;62(4):711-24. Epub 2016/04/02. doi: 10.1007/s00294-016-  
936 0596-0. PubMed PMID: 27032776.
- 937 47. Rathkey JK, Benson BL, Chirieleison SM, Yang J, Xiao TS, Dubyak GR, et al. Live-  
938 cell visualization of gasdermin D-driven pyroptotic cell death. *J Biol Chem*.  
939 2017;292(35):14649-58. Epub 2017/07/21. doi: 10.1074/jbc.M117.797217. PubMed PMID:  
940 28726636; PubMed Central PMCID: PMC5582855.
- 941 48. Wullschleger S, Loewith R, Hall MN. TOR signaling in growth and metabolism. *Cell*.  
942 2006;124(3):471-84. Epub 2006/02/14. doi: 10.1016/j.cell.2006.01.016. PubMed PMID:  
943 16469695.
- 944 49. Morozumi Y, Shiozaki K. Conserved and Divergent Mechanisms That Control  
945 TORC1 in Yeasts and Mammals. *Genes (Basel)*. 2021;12(1). Epub 2021/01/16. doi:  
946 10.3390/genes12010088. PubMed PMID: 33445779; PubMed Central PMCID:  
947 PMC7828246.
- 948 50. Urban J, Souldard A, Huber A, Lippman S, Mukhopadhyay D, Deloche O, et al. Sch9  
949 is a major target of TORC1 in *Saccharomyces cerevisiae*. *Mol Cell*. 2007;26(5):663-74.  
950 Epub 2007/06/15. doi: 10.1016/j.molcel.2007.04.020. PubMed PMID: 17560372.
- 951 51. Wei Y, Tsang CK, Zheng XF. Mechanisms of regulation of RNA polymerase III-  
952 dependent transcription by TORC1. *EMBO J*. 2009;28(15):2220-30. Epub 2009/07/04. doi:  
953 10.1038/emboj.2009.179. PubMed PMID: 19574957; PubMed Central PMCID:  
954 PMC2726700.

- 955 52. Kamada Y, Yoshino K, Kondo C, Kawamata T, Oshiro N, Yonezawa K, et al. Tor  
956 directly controls the Atg1 kinase complex to regulate autophagy. *Mol Cell Biol*.  
957 2010;30(4):1049-58. Epub 2009/12/10. doi: 10.1128/MCB.01344-09. PubMed PMID:  
958 19995911; PubMed Central PMCID: PMCPMC2815578.
- 959 53. Wei Y, Zheng XF. Sch9 partially mediates TORC1 signaling to control ribosomal  
960 RNA synthesis. *Cell cycle (Georgetown, Tex)*. 2009;8(24):4085-90. Epub 2009/10/14. doi:  
961 10.4161/cc.8.24.10170. PubMed PMID: 19823048; PubMed Central PMCID:  
962 PMCPMC3023923.
- 963 54. Lee J, Moir RD, Willis IM. Regulation of RNA polymerase III transcription involves  
964 SCH9-dependent and SCH9-independent branches of the target of rapamycin (TOR)  
965 pathway. *J Biol Chem*. 2009;284(19):12604-8. Epub 2009/03/21. doi:  
966 10.1074/jbc.C900020200. PubMed PMID: 19299514; PubMed Central PMCID:  
967 PMCPMC2675989.
- 968 55. Nair U, Thumm M, Klionsky DJ, Krick R. GFP-Atg8 protease protection as a tool to  
969 monitor autophagosome biogenesis. *Autophagy*. 2011;7(12):1546-50. Epub 2011/11/24.  
970 doi: 10.4161/auto.7.12.18424. PubMed PMID: 22108003; PubMed Central PMCID:  
971 PMCPMC3327617.
- 972 56. Tsukada M, Ohsumi Y. Isolation and characterization of autophagy-defective  
973 mutants of *Saccharomyces cerevisiae*. *FEBS Lett*. 1993;333(1-2):169-74. Epub  
974 1993/10/25. doi: 10.1016/0014-5793(93)80398-e. PubMed PMID: 8224160.
- 975 57. Onodera J, Ohsumi Y. Autophagy is required for maintenance of amino acid levels  
976 and protein synthesis under nitrogen starvation. *J Biol Chem*. 2005;280(36):31582-6. Epub  
977 2005/07/20. doi: 10.1074/jbc.M506736200. PubMed PMID: 16027116.
- 978 58. Kingsbury JM, Sen ND, Maeda T, Heitman J, Cardenas ME. Endolysosomal  
979 membrane trafficking complexes drive nutrient-dependent TORC1 signaling to control cell  
980 growth in *Saccharomyces cerevisiae*. *Genetics*. 2014;196(4):1077-89. Epub 2014/02/12.



981 doi: 10.1534/genetics.114.161646. PubMed PMID: 24514902; PubMed Central PMCID:  
982 PMCPMC3982701.

983 59. Takeda E, Jin N, Itakura E, Kira S, Kamada Y, Weisman LS, et al. Vacuole-  
984 mediated selective regulation of TORC1-Sch9 signaling following oxidative stress. *Mol Biol*  
985 *Cell*. 2018;29(4):510-22. Epub 2017/12/15. doi: 10.1091/mbc.E17-09-0553. PubMed  
986 PMID: 29237820; PubMed Central PMCID: PMCPMC6014174.

987 60. Gao J, Nicastro R, Peli-Gulli MP, Grziwa S, Chen Z, Kurre R, et al. The HOPS  
988 tethering complex is required to maintain signaling endosome identity and TORC1 activity.  
989 *J Cell Biol*. 2022;221(5). Epub 2022/04/12. doi: 10.1083/jcb.202109084. PubMed PMID:  
990 35404387; PubMed Central PMCID: PMCPMC9011323.

991 61. Hatakeyama R, Peli-Gulli MP, Hu Z, Jaquenoud M, Garcia Osuna GM, Sardu A, et  
992 al. Spatially Distinct Pools of TORC1 Balance Protein Homeostasis. *Mol Cell*.  
993 2019;73(2):325-38 e8. Epub 2018/12/12. doi: 10.1016/j.molcel.2018.10.040. PubMed  
994 PMID: 30527664.

995 62. Zhou F, Wu Z, Zhao M, Murtazina R, Cai J, Zhang A, et al. Rab5-dependent  
996 autophagosome closure by ESCRT. *J Cell Biol*. 2019;218(6):1908-27. Epub 2019/04/24.  
997 doi: 10.1083/jcb.201811173. PubMed PMID: 31010855; PubMed Central PMCID:  
998 PMCPMC6548130.

999 63. Reggiori F, Ungermann C. Autophagosome Maturation and Fusion. *J Mol Biol*.  
1000 2017;429(4):486-96. Epub 2017/01/13. doi: 10.1016/j.jmb.2017.01.002. PubMed PMID:  
1001 28077293.

1002 64. Vida TA, Emr SD. A new vital stain for visualizing vacuolar membrane dynamics  
1003 and endocytosis in yeast. *J Cell Biol*. 1995;128(5):779-92. Epub 1995/03/01. doi:  
1004 10.1083/jcb.128.5.779. PubMed PMID: 7533169; PubMed Central PMCID:  
1005 PMCPMC2120394.

- 1006 65. Plemel RL, Lobingier BT, Brett CL, Angers CG, Nickerson DP, Paulsel A, et al.  
1007 Subunit organization and Rab interactions of Vps-C protein complexes that control  
1008 endolysosomal membrane traffic. *Mol Biol Cell*. 2011;22(8):1353-63. Epub 2011/02/18.  
1009 doi: 10.1091/mbc.E10-03-0260. PubMed PMID: 21325627; PubMed Central PMCID:  
1010 PMCPMC3078060.
- 1011 66. Williams RL, Urbé S. The emerging shape of the ESCRT machinery. *Nat Rev Mol*  
1012 *Cell Biol*. 2007;8(5):355-68. Epub 2007/04/24. doi: 10.1038/nrm2162. PubMed PMID:  
1013 17450176.
- 1014 67. Meng Y, Davies KA, Fitzgibbon C, Young SN, Garnish SE, Horne CR, et al. Human  
1015 RIPK3 maintains MLKL in an inactive conformation prior to cell death by necroptosis.  
1016 *Nature Communications*. 2021;12(1):6783. doi: 10.1038/s41467-021-27032-x.
- 1017 68. Zhan C, Huang M, Yang X, Hou J. MLKL: Functions beyond serving as the  
1018 Executioner of Necroptosis. *Theranostics*. 2021;11(10):4759-69. Epub 2021/03/24. doi:  
1019 10.7150/thno.54072. PubMed PMID: 33754026; PubMed Central PMCID:  
1020 PMCPMC7978304.
- 1021 69. Samson AL, Zhang Y, Geoghegan ND, Gavin XJ, Davies KA, Mlodzianoski MJ, et  
1022 al. MLKL trafficking and accumulation at the plasma membrane control the kinetics and  
1023 threshold for necroptosis. *Nat Commun*. 2020;11(1):3151. Epub 2020/06/21. doi:  
1024 10.1038/s41467-020-16887-1. PubMed PMID: 32561730; PubMed Central PMCID:  
1025 PMCPMC7305196.
- 1026 70. Aglietti RA, Estevez A, Gupta A, Ramirez MG, Liu PS, Kayagaki N, et al. GsdmD  
1027 p30 elicited by caspase-11 during pyroptosis forms pores in membranes. *Proc Natl Acad*  
1028 *Sci U S A*. 2016;113(28):7858-63. Epub 2016/06/25. doi: 10.1073/pnas.1607769113.  
1029 PubMed PMID: 27339137; PubMed Central PMCID: PMCPMC4948338.
- 1030 71. Santa Cruz Garcia AB, Schnur KP, Malik AB, Mo GCH. Gasdermin D pores are  
1031 dynamically regulated by local phosphoinositide circuitry. *Nat Commun*. 2022;13(1):52.

- 1032 Epub 2022/01/12. doi: 10.1038/s41467-021-27692-9. PubMed PMID: 35013201; PubMed  
1033 Central PMCID: PMCPMC8748731.
- 1034 72. Dudek J. Role of Cardiolipin in Mitochondrial Signaling Pathways. *Front Cell Dev*  
1035 *Biol.* 2017;5:90. Epub 2017/10/17. doi: 10.3389/fcell.2017.00090. PubMed PMID:  
1036 29034233; PubMed Central PMCID: PMCPMC5626828.
- 1037 73. van Meer G, Voelker DR, Feigenson GW. Membrane lipids: where they are and  
1038 how they behave. *Nat Rev Mol Cell Biol.* 2008;9(2):112-24. Epub 2008/01/25. doi:  
1039 10.1038/nrm2330. PubMed PMID: 18216768; PubMed Central PMCID:  
1040 PMCPMC2642958.
- 1041 74. Tuller G, Hrastnik C, Achleitner G, Schiefthaler U, Klein F, Daum G. YDL142c  
1042 encodes cardiolipin synthase (CIs1p) and is non-essential for aerobic growth of  
1043 *Saccharomyces cerevisiae*. *FEBS Lett.* 1998;421(1):15-8. Epub 1998/02/14. doi:  
1044 10.1016/s0014-5793(97)01525-1. PubMed PMID: 9462830.
- 1045 75. Day KJ, Casler JC, Glick BS. Budding Yeast Has a Minimal Endomembrane  
1046 System. *Dev Cell.* 2018;44(1):56-72 e4. Epub 2018/01/10. doi:  
1047 10.1016/j.devcel.2017.12.014. PubMed PMID: 29316441; PubMed Central PMCID:  
1048 PMCPMC5765772.
- 1049 76. Ruhl S, Shkarina K, Demarco B, Heilig R, Santos JC, Broz P. ESCRT-dependent  
1050 membrane repair negatively regulates pyroptosis downstream of GSDMD activation.  
1051 *Science.* 2018;362(6417):956-60. Epub 2018/11/24. doi: 10.1126/science.aar7607.  
1052 PubMed PMID: 30467171.
- 1053 77. Zhan Q, Jeon J, Li Y, Huang Y, Xiong J, Wang Q, et al. CAMK2/CaMKII activates  
1054 MLKL in short-term starvation to facilitate autophagic flux. *Autophagy.* 2021:1-19. Epub  
1055 2021/07/21. doi: 10.1080/15548627.2021.1954348. PubMed PMID: 34282994.
- 1056 78. Gong YN, Guy C, Olauson H, Becker JU, Yang M, Fitzgerald P, et al. ESCRT-III  
1057 Acts Downstream of MLKL to Regulate Necroptotic Cell Death and Its Consequences.

- 1058 Cell. 2017;169(2):286-300 e16. Epub 2017/04/08. doi: 10.1016/j.cell.2017.03.020.
- 1059 PubMed PMID: 28388412; PubMed Central PMCID: PMC5443414.
- 1060 79. Fan W, Guo J, Gao B, Zhang W, Ling L, Xu T, et al. Flotillin-mediated endocytosis  
1061 and ALIX-syntenin-1-mediated exocytosis protect the cell membrane from damage caused  
1062 by necroptosis. *Sci Signal*. 2019;12(583). Epub 2019/05/30. doi:  
1063 10.1126/scisignal.aaw3423. PubMed PMID: 31138766.
- 1064 80. Xia B, Qie J, Shen X, Wang S, Gao Z. Enhanced channel activity by PI(4,5)P2  
1065 ignites MLKL-related pathogenic processes. *Cell Discov*. 2022;8(1):111. Epub 2022/10/18.  
1066 doi: 10.1038/s41421-022-00451-w. PubMed PMID: 36253347; PubMed Central PMCID:  
1067 PMC5443414.
- 1068 81. Chai Q, Yu S, Zhong Y, Lu Z, Qiu C, Yu Y, et al. A bacterial phospholipid  
1069 phosphatase inhibits host pyroptosis by hijacking ubiquitin. *Science*.  
1070 2022;378(6616):eabq0132. Epub 2022/10/14. doi: 10.1126/science.abq0132. PubMed  
1071 PMID: 36227980.
- 1072 82. Yao R, Chen Y, Hao H, Guo Z, Cheng X, Ma Y, et al. Pathogenic effects of  
1073 inhibition of mTORC1/STAT3 axis facilitates *Staphylococcus aureus*-induced pyroptosis in  
1074 human macrophages. *Cell Commun Signal*. 2020;18(1):187. Epub 2020/12/02. doi:  
1075 10.1186/s12964-020-00677-9. PubMed PMID: 33256738; PubMed Central PMCID:  
1076 PMC5443414.
- 1077 83. Zheng Z, Deng W, Bai Y, Miao R, Mei S, Zhang Z, et al. The Lysosomal Rag-  
1078 Regulator Complex Licenses RIPK1 and Caspase-8-mediated Pyroptosis by *Yersinia*.  
1079 *Science*. 2021;372(6549). Epub 2022/01/22. doi: 10.1126/science.abg0269. PubMed  
1080 PMID: 35058659; PubMed Central PMCID: PMC8769499.
- 1081 84. Lahiri V, Klionsky DJ. Spatially distinct pools of TORC1 balance protein  
1082 homeostasis. *Autophagy*. 2019;15(4):561-4. Epub 2019/01/31. doi:

- 1083 10.1080/15548627.2019.1575162. PubMed PMID: 30696339; PubMed Central PMCID:  
1084 PMC6526836.
- 1085 85. Sellers-Moya Á, Nuévalos M, Molina M, Martín H. Clotrimazole-Induced Oxidative  
1086 Stress Triggers Novel Yeast Pkc1-Independent Cell Wall Integrity MAPK Pathway  
1087 Circuitry. *Journal of Fungi*. 2021;7(8):647. PubMed PMID: doi:10.3390/jof7080647.
- 1088 86. Alberti S, Gitler AD, Lindquist S. A suite of Gateway cloning vectors for high-  
1089 throughput genetic analysis in *Saccharomyces cerevisiae*. *Yeast*. 2007;24(10):913-9.  
1090 Epub 2007/06/23. doi: 10.1002/yea.1502. PubMed PMID: 17583893; PubMed Central  
1091 PMCID: PMC6526836.
- 1092 87. Suzuki K, Akioka M, Kondo-Kakuta C, Yamamoto H, Ohsumi Y. Fine mapping of  
1093 autophagy-related proteins during autophagosome formation in *Saccharomyces*  
1094 *cerevisiae*. *J Cell Sci*. 2013;126(Pt 11):2534-44. Epub 2013/04/04. doi:  
1095 10.1242/jcs.122960. PubMed PMID: 23549786.
- 1096 88. Péli-Gulli MP, Sardu A, Panchaud N, Raucci S, De Virgilio C. Amino Acids  
1097 Stimulate TORC1 through Lst4-Lst7, a GTPase-Activating Protein Complex for the Rag  
1098 Family GTPase Gtr2. *Cell Rep*. 2015;13(1):1-7. Epub 2015/09/22. doi:  
1099 10.1016/j.celrep.2015.08.059. PubMed PMID: 26387955.
- 1100 89. Palermo V, Falcone C, Mazzoni C. Apoptosis and aging in mitochondrial  
1101 morphology mutants of *S. cerevisiae*. *Folia Microbiol (Praha)*. 2007;52(5):479-83. Epub  
1102 2008/02/27. doi: 10.1007/bf02932107. PubMed PMID: 18298044.
- 1103 90. Liu W, Xie Y, Ma J, Luo X, Nie P, Zuo Z, et al. IBS: an illustrator for the  
1104 presentation and visualization of biological sequences. *Bioinformatics*. 2015;31(20):3359-  
1105 61. doi: 10.1093/bioinformatics/btv362.

1106

1107 **Figure legends**

1108 **Figure 1.** The NTD of GSDMD and the 4HB domain of MLKL inhibit yeast growth. **(A)**  
1109 Schematic representation of GSDMD depicting its NTD (red), CTD (yellow), and the aspartic  
1110 residue (D) susceptible to Caspase-1 cleavage. **(B)** Immunoblot showing the expression of  
1111 GSDMD and GSDMD(NT) in yeast lysates of BY4741 strain bearing plasmids pAG416-  
1112 GSDMD-EGFP and pAG416-GSDMD(NT)-EGFP after 5 h of induction in SG medium.  
1113 pAG416-EGFP empty vector was used as a control. The membrane was hybridized with  
1114 anti-GFP antibody. Anti-G6PDH antibody was used as a loading control. **(C)** Spot growth  
1115 assay of cells bearing the same plasmids as in **(B)**. Cells were cultured on SD (Glucose)  
1116 and SG (Galactose) agar media for repression and induction of GSDMD and GSDMD(NT)  
1117 expression, respectively. **(D)** Growth curves of cells bearing the same plasmids as in **(B)**  
1118 performed in SG medium. Measures of optical density at 600nm ( $OD_{600}$ ) were taken each  
1119 two hours throughout the exponential growth phase. Results are represented as  $OD_{600}$  vs.  
1120 time in a semilogarithmic plot. **(E)** Schematic representation of MLKL depicting its 4HB (red),  
1121 brace (blue), and PK (yellow) domains. The T357/S358 residues, susceptible to  
1122 phosphorylation, and their corresponding PMs T357E/S358D are also highlighted. **(F)**  
1123 Immunoblot showing the expression of MLKL, MLKL(PM) and MLKL(1-182) performed as  
1124 in **(B)** using yeast lysates of BY4741 strain bearing plasmids pAG416-MLKL-EGFP,  
1125 pAG416-MLKL(PM)-EGFP, and pAG416-MLKL(1-182)-EGFP. **(G)** Spot growth assay  
1126 performed as in **(C)** but using BY4741 strain bearing the same plasmids as in **(F)**. **(H)** Growth  
1127 curves of cells bearing the same plasmids as in **(F)** performed as in **(D)**. A representative  
1128 assay from three different experiments with different transformants is shown in all cases. In  
1129 **(D, H)**, results correspond to the mean of three biological replicates performed on different  
1130 transformants. Error bars represent SD. Asterisks (\*, \*\*\*) indicate a p-value < 0.05 and 0.001  
1131 by Dunn's test, respectively.

1132 **Figure 2.** The NTD of GSDMD and MLKL aggregate in cytoplasmic spots in yeast. **(A-B)**  
1133 Fluorescent and bright-field differential interference contrast (DIC) microscopy of BY4741  
1134 strain bearing the same plasmids as in **Fig. 1B and Fig. 1F**, respectively. **(C-D)** Immunoblots  
1135 showing a comparison under reducing (+DTT) and non-reducing (-DTT) conditions of yeast  
1136 lysates of BY4741 strain bearing the same plasmids as in **A-B**, respectively. Red arrowheads  
1137 mark high molecular weight protein aggregates enhanced in the absence of DTT. The  
1138 membranes were hybridized with anti-GFP antibody. Anti-G6PDH antibody was used as a  
1139 loading control. **(E, left panel)** Graph showing the percentage of cells with Hsp104  
1140 aggregates ( $n > 100$ ) for each population of MVY07 strain bearing the same plasmids as in  
1141 **A-B**. Results correspond to the mean of three biological replicates performed on different  
1142 transformants. Error bars represent SD. Asterisks (\*\*\*) indicate a p-value  $< 0.001$  by Tukey's  
1143 HSD test. Only statistical differences between the different samples and the control are  
1144 depicted. **(E, right panel)** Colocalization of Hsp104 aggregates with MLKL and MLKL(PM),  
1145 respectively. Protein expression was induced for 5 h in SG medium in all cases. All scale  
1146 bars indicate 5  $\mu\text{m}$ . A representative assay from three different experiments with different  
1147 transformants is shown in all cases.

1148 **Figure 3.** The NTDs of GSDMD and MLKL cause a decrease in cell viability. **(A-B)** Graphs  
1149 showing the percentage of PI-positive stained cells ( $n = 10,000$ ) for each population of  
1150 BY4741 strain bearing the same plasmids as in **Fig. 1B and Fig. 1F**, respectively. **(C-D)**  
1151 Graphs showing the percentage of viable cells determined by a cell viability assay of BY4741  
1152 strain bearing the same plasmids as in **(A-B)**, respectively. Protein expression was induced  
1153 for 5 h in SG medium in all cases. Results correspond to the mean of three biological  
1154 replicates performed on different transformants. Error bars represent SD. Asterisks (\*, \*\*, \*\*\*  
1155 \*\*\*) indicate a p-value  $< 0.05$ ,  $< 0.01$ , and  $< 0.001$ , respectively, by Tukey's HSD test.

1156 **Figure 4.** The NTDs of GSDMD and MLKL fragment the mitochondrial network. **(A)** Stacked  
1157 images obtained by confocal fluorescence microscopy of BY4741 strain bearing the  
1158 mitochondrial marker pOB06 (Ilv6-mCherry) and plasmids pAG416-GSDMD-EGFP and  
1159 pAG416-GSDMD(NT)-EGFP, respectively. pAG416 empty vector was used as a control.  
1160 See also **Fig. S3A**. **(B)** Quantification (n>100) by fluorescence microscopy of the percentage  
1161 of cells showing fragmented mitochondria for each population shown in **(A)**. **(C)** Stacked  
1162 images obtained by confocal fluorescence microscopy of BY4741 strain bearing the  
1163 mitochondrial marker pOB06 (Ilv6-mCherry) and plasmids pAG416-MLKL-EGFP, pAG416-  
1164 MLKL(PM)-EGFP, and pAG416-MLKL(1-182)-EGFP, respectively. pAG416 empty vector  
1165 was used as a control. See also **Fig. S3B**. **(D)** Quantification (n>100) by fluorescence  
1166 microscopy of the percentage of cells showing fragmented mitochondria for each population  
1167 shown in **(C)**. Protein expression was induced for 5 h in SG medium. All scale bars indicate  
1168 5  $\mu$ m. Results correspond to the mean of three biological replicates performed on different  
1169 transformants in all cases. Error bars represent SD. Asterisks (\*, \*\*, \*\*\*) indicate a p-value  
1170 <0.05, <0.01, and <0.001 by Tukey's HSD test.

1171 **Figure 5.** Functionality correlates with aggregation in mutants of the NTD of GSDMD. **(A)**  
1172 Spot growth assay of BY4741 strain bearing plasmids pAG416-GSDMD-EGFP WT or  
1173 A377D and pAG416-GSDMD(NT)-EGFP WT, L59G, F80D, I90D, or 4A. Cells were cultured  
1174 on SD (Glucose) and SG (Galactose) agar media for repression and induction of GSDMD  
1175 and GSDMD(NT) specified versions, respectively. pAG416-EGFP empty vector was used  
1176 as a control. **(B)** Immunoblot showing the expression of GSDMD and GSDMD(NT) mutants  
1177 in yeast lysates of BY4741 strain bearing the same plasmids as in **(A)** after 5 h of induction  
1178 in SG medium. **(C)** Fluorescent and bright field (DIC) microscopy of BY4741 strain bearing  
1179 the same plasmids as in **(A)** after 5 h of induction in SG medium. Scale bar indicates 5  $\mu$ m.  
1180 **(D)** Immunoblot showing a comparison under reducing (+DTT) and non-reducing (-DTT)



1181 conditions of yeast lysates of BY4741 strain bearing the same plasmids as in **A**, after 5 h of  
1182 induction in SG medium. Red arrowheads mark high molecular weight protein aggregates  
1183 enhanced in the absence of DTT. Membranes in **(B, D)** were hybridized with anti-GFP  
1184 antibody. Anti-G6PDH antibody was used as a loading control. A representative assay from  
1185 three different experiments with different transformants is shown in all cases.

1186 **Figure 6.** Non-functional mutants of the NTD of GSDMD colocalize with the mitochondrial  
1187 network. Stacked images obtained by confocal fluorescence microscopy of BY4741 strain  
1188 bearing the mitochondrial marker pOB06 (Ilv6-mCherry) and plasmids pAG416-  
1189 GSDMD(NT)-EGFP L59G, F80D, I90D or 4A, after 5 h of induction in SG medium. pAG416  
1190 empty vector was used as a control. Scale bar indicates 5  $\mu$ m. See also **Fig. S5**.

1191 **Figure 7.** The NTDs of GSDMD and MLKL cause cell cycle arrest through the inhibition of  
1192 TORC1. **(A)** Cell cycle profiles obtained by measuring DNA content (FL2-A) of cells stained  
1193 with PI and subsequently analyzed by flow cytometry (n=10,000) (left panels), and graph  
1194 showing the percentage of cells in phase G0/G1 for each population (right panel) of BY4741  
1195 strain bearing plasmids as in **Fig. 1B** and **Fig. 1F**, after 5 h of induction in SG medium. **(B)**  
1196 Immunoblot showing Sch9 phosphorylation (upper panel) and quantification of P-Sch9  
1197 relative to total Sch9 (lower panel) in yeast lysates of BY4741 strain bearing the plasmid  
1198 pJU676 (Sch9-5xHA) and pAG413-GSDMD-EGFP, pAG413-GSDMD(NT)-EGFP, pAG413-  
1199 MLKL-EGFP, pAG413-MLKL(PM)-EGFP or pAG413-MLKL(1-182)-EGFP after 7 h of  
1200 induction in SG medium. pAG413-EGFP empty vector was used as a control. **(C)**  
1201 Immunoblot showing Atg13 phosphorylation (upper panel) and quantification of P-Atg13  
1202 relative to total Atg13 (lower panel) in yeast lysates of BY4741 strain bearing the plasmid  
1203 HC078 (3xHA-Atg13) and the same plasmids as in **(B)**. **(D)** Immunoblot showing Maf1  
1204 phosphorylation (upper panel) and quantification of P-Maf1 relative to total Maf1 (lower  
1205 panel) in yeast lysates of BY4741 strain bearing the plasmid pAH099 (Maf1-3xHA) and the

1206 same plasmids as in (B). In (B-D), cells treated with 100nM rapamycin for 5 h were used as  
1207 a positive control of TORC1 inhibition. Membranes were hybridized with anti-HA antibody.  
1208 Anti-G6PDH antibody was used as a loading control. A representative blot from three  
1209 different experiments with different transformants is shown. In (A-D), results correspond to  
1210 the mean of three biological replicates performed on different transformants. Error bars  
1211 represent SD. Asterisks (\*, \*\*, \*\*\*) indicate a p-value < 0.05, < 0.01, and < 0.001, respectively,  
1212 by Tukey's HSD test.

1213 **Figure 8.** GSDMD(NT) and MLKL impair autophagy. (A) Immunoblot showing Atg8-GFP  
1214 degradation in yeast lysates of BY4741 *trp1Δ* strain bearing the autophagic marker pRS314-  
1215 GFP-Atg8 and pAG413-GSDMD-DsRed, pAG413-GSDMD(NT)-DsRed, pAG413-MLKL-  
1216 DsRed, pAG413-MLKL(PM)-DsRed or pAG413-MLKL(1-182)-DsRed after 7 h of induction  
1217 in SG medium. pAG413-DsRed empty vector was used as a control. Cells treated with  
1218 100nM rapamycin for 5 h were used as a positive control of autophagy. (B) Immunoblot  
1219 showing Atg8-GFP degradation (left panel) and quantification of released GFP relative to  
1220 Atg8-GFP (right panel) after 5 h of induction in SG medium followed by a 2 h treatment with  
1221 rapamycin 100nM in yeast lysates of BY4741 *trp1Δ* strain bearing the same plasmids as in  
1222 (A). Cells bearing pAG413-DsRed empty vector and treated with rapamycin for 2 h were  
1223 used as a positive control of autophagy. Cells bearing pAG413-DsRed empty vector and  
1224 untreated with rapamycin (NT) were used as a negative control of autophagy. (C)  
1225 Fluorescent and bright-field (DIC) (upper panels) and quantification (n > 100) of Atg8-GFP  
1226 localization (lower panel) performed as in (B). Scale bar indicates 5 μm. In (A-B),  
1227 membranes were hybridized with anti-GFP antibody. Anti-G6PDH antibody was used as a  
1228 loading control. A representative blot from three different experiments with different  
1229 transformants is shown. In (B-C), results correspond to the mean of three biological

1230 replicates performed on different transformants. Error bars represent SD. Asterisks (\*, \*\*,  
1231 \*\*\*) indicate a p-value <0.05, <0.01, and <0.001 respectively, by Tukey's HSD test.

1232 **Figure 9.** The NTDs of GSDMD and MLKL distinctly disrupt endosomal traffic. **(A-B)**  
1233 Fluorescent and bright-field (DIC) microscopy of BY4741 strain bearing the same plasmids  
1234 as in **Fig. 1B** and **Fig. 1F**, respectively, stained with FM4-64. **(C)** Quantification (n>100) of  
1235 the percentage of cells showing a class C and E phenotype for each population shown in  
1236 **(A-B)**. **(D)** Fluorescent, bright-field (DIC) microscopy, and quantification (n>100) of the  
1237 percentage of cells showing a class C and E *vps* phenotype for each population of BY4741  
1238 strain bearing the same plasmids as in **Fig. 5A** stained with FM4-64. Protein expression was  
1239 induced for 5 h in SG medium in all cases. All scale bars indicate 5  $\mu$ m. Results correspond  
1240 to the mean of three biological replicates performed on different transformants. Error bars  
1241 represent SD. Asterisks (\*\*\*) indicate a p-value <0.001 by Tukey's HSD test.

## 1242 Tables

1243 **Table 1.** Oligonucleotides used in this work

| Name           | Sequence                                                                                 |
|----------------|------------------------------------------------------------------------------------------|
| Hsp104_mCh_Fw  | 5'-CACGTTAGGTGATGACGATAATGAGGACAGTATGGAAATTGATGATGACCTAGATGGTGAC<br>GGTGCTGGT-3'         |
| Hsp104_mCh_Rv  | 5'-TATATTATATTACTGATTCTTGTTTCGAAAGTTTTTAAAAATCACACTATATTTAAACTGGATGG<br>CGGCGTTAG -3'    |
| GSDMD_Fw       | 5'-GGGGACAAGTTTGTACAAAAAAGCAGGCTTCACCATGGGGTCGGCCTTTGAG-3'                               |
| GSDMD_Rv2      | 5'-GGGGACCACTTTGTACAAGAAAGCTGGGTTGTGGGGCTCCTGGCTCAG-3'                                   |
| NGSDMD_Rv      | 5'-GGGGACCACTTTGTACAAGAAAGCTGGGTTATCTGTCAGGAAGTTGTGGAGG-3'                               |
| GSDMD_FLAG_Rv  | 5'-GGGGACCACTTTGTACAAGAAAGCTGGGTTCACTTGTGTCATCGTCTTTGTAGTCGTGG<br>GGCTCCTGGCTCAG -3'     |
| NGSDMD_FLAG_Rv | 5'-GGGGACCACTTTGTACAAGAAAGCTGGGTTCACTTGTGTCATCGTCTTTGTAGTCATCTG<br>TCAGGAAGTTGTGGAGG -3' |
| MLKL_Fw        | 5'-GGGGACAAGTTTGTACAAAAAAGCAGGCTTCACCATGGAAAATTTGAAGCATATTATCACC<br>-3'                  |

|               |                                                              |
|---------------|--------------------------------------------------------------|
| MLKL_Rv       | 5'-GGGGACCACTTTGTACAAGAAAGCTGGGTTCTTAGAAAAGGTGGAGAGTTTC-3'   |
| MLKL 1-182_Rv | 5'-GGGGACCACTTTGTACAAGAAAGCTGGGTTTGGTGGTAAATACTGCCTC-3'      |
| PmMLKL_Fw     | 5'-GAGGAAAACACAGGAAGACATGAGTTTGGGAACTACGAGAGAAAAGACAGACAG-3' |
| PmMLKL_Rv     | 5'-CCCAAACATCATGTCTTCTGTGTTTTCTCAACTCAAATCCTGCAAGCTTCAC-3'   |
| A377D_Fw      | 5'-CTGCTGGGGACCTGACCATGCTGAGTGAAAC-3'                        |
| A377D_Rv      | 5'-GCATGGTCAGGTCCCCCAGCAGGTAGACAAC-3'                        |
| L59G_Fw       | 5'-GTGTGTCAACGGGTCTATCAAGGACATCCTGGAGC-3'                    |
| L59G_Rv       | 5'-CAGGATGTCCTTGATAGACCCGTTGACACACTTATAACGG-3'               |
| F80D_Fw       | 5'-GTGGCAGGAGCGACCACTTCTACGATGCCATG-3'                       |
| F80D_Rv       | 5'-GTAGAAGTGGTCGCTCCTGCCACGCTGCAC-3'                         |
| I90D_Fw       | 5'-GGATGGGCAGGACCAGGGCAGCGTGGAGCTG-3'                        |
| I90D_Rv       | 5'-CGCTGCCCTGGTCCTGCCCATCCATGGCATCG-3'                       |

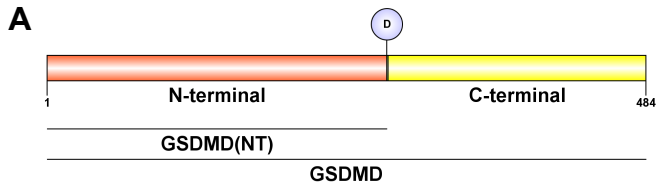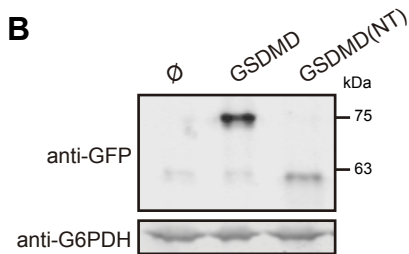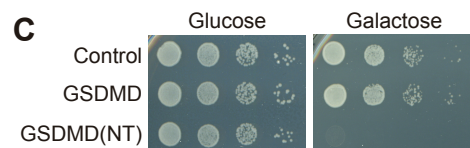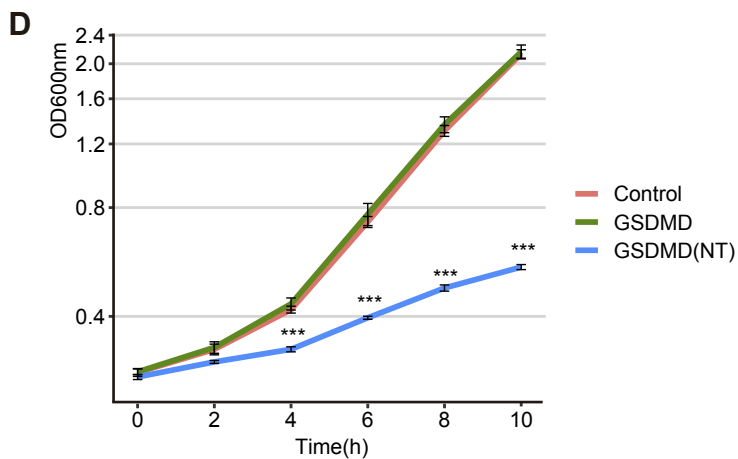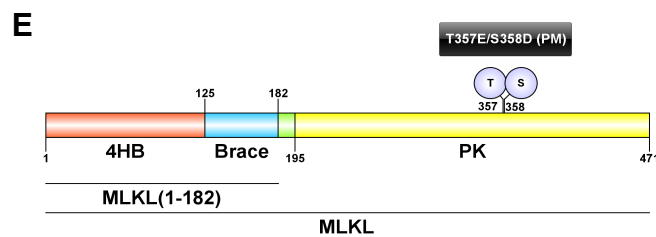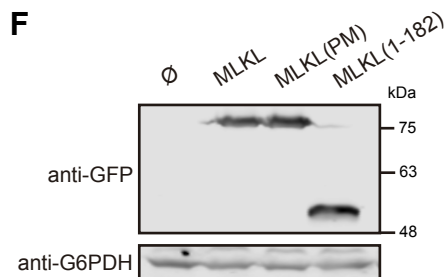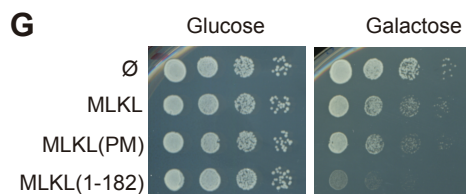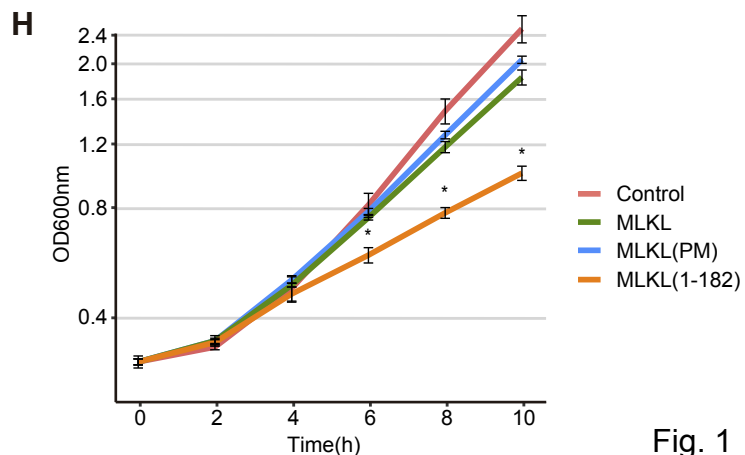

Fig. 1

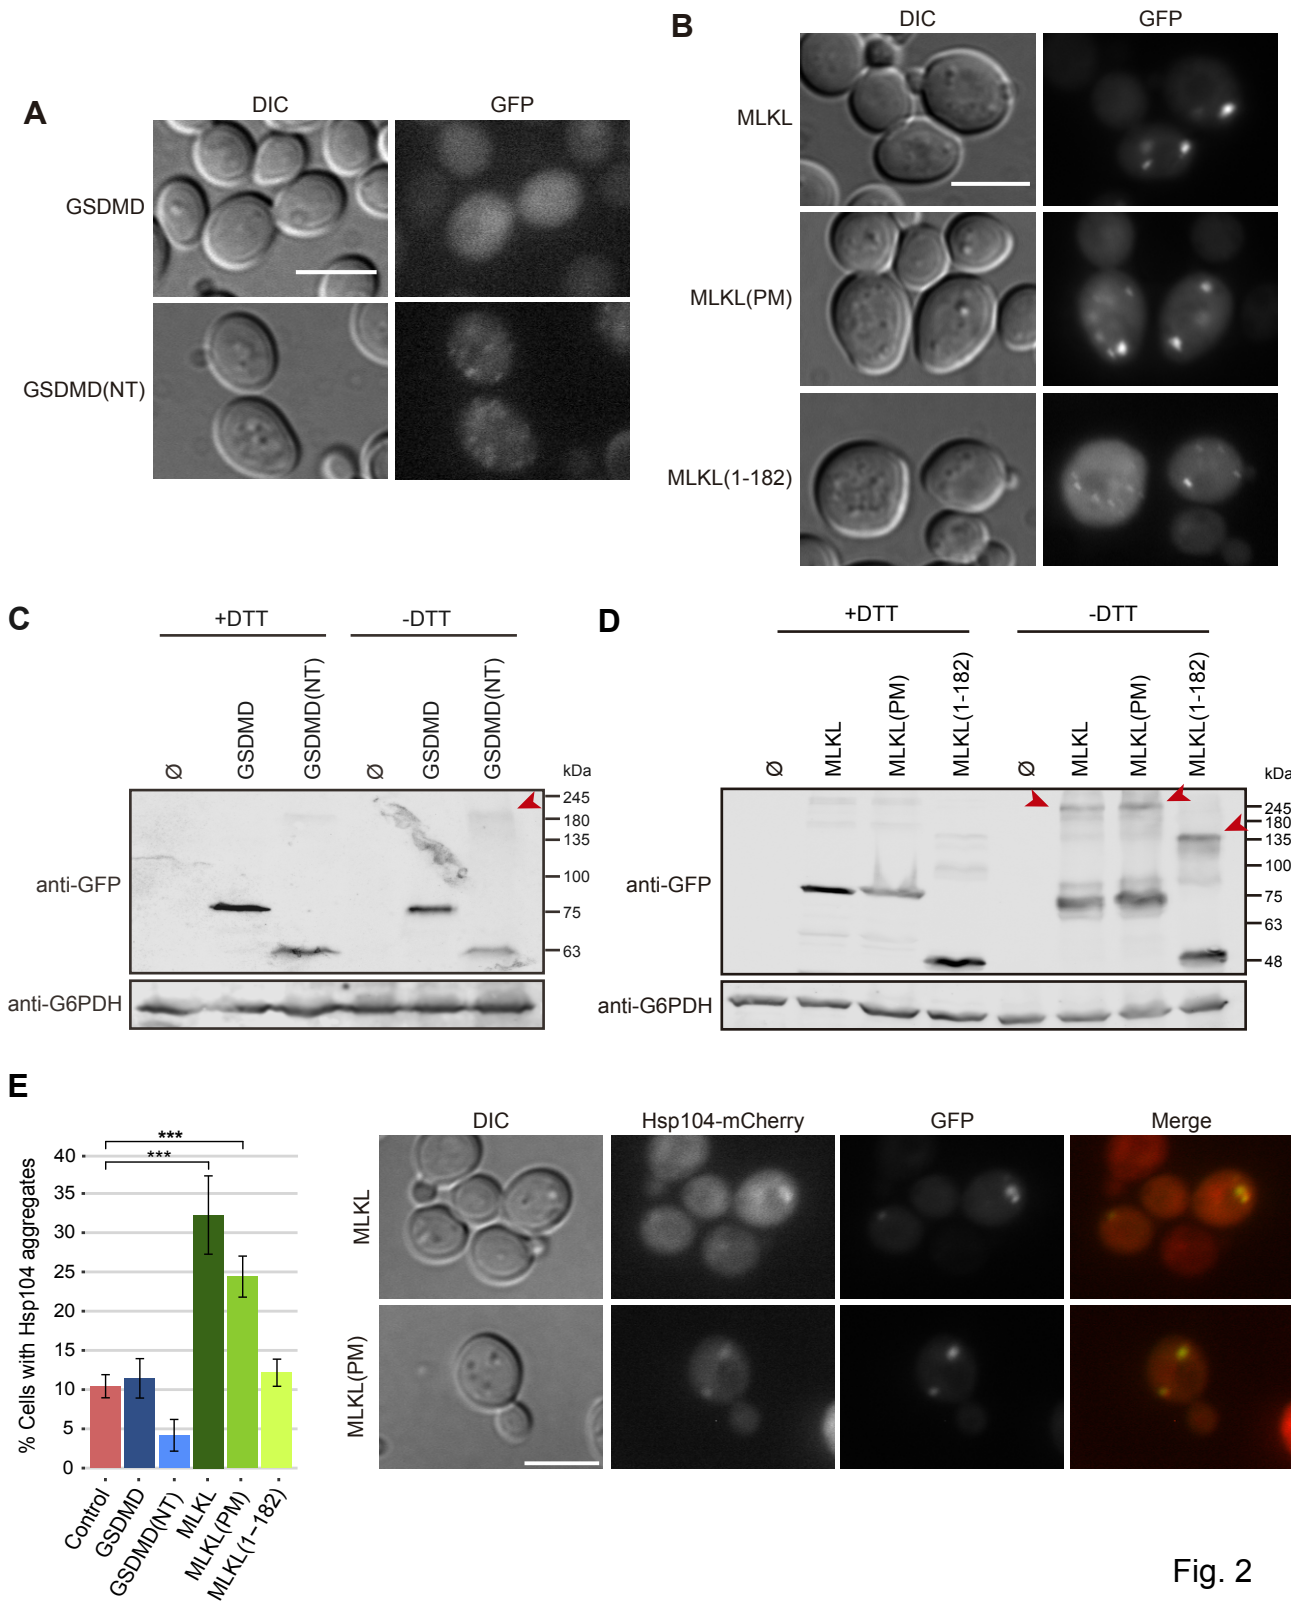

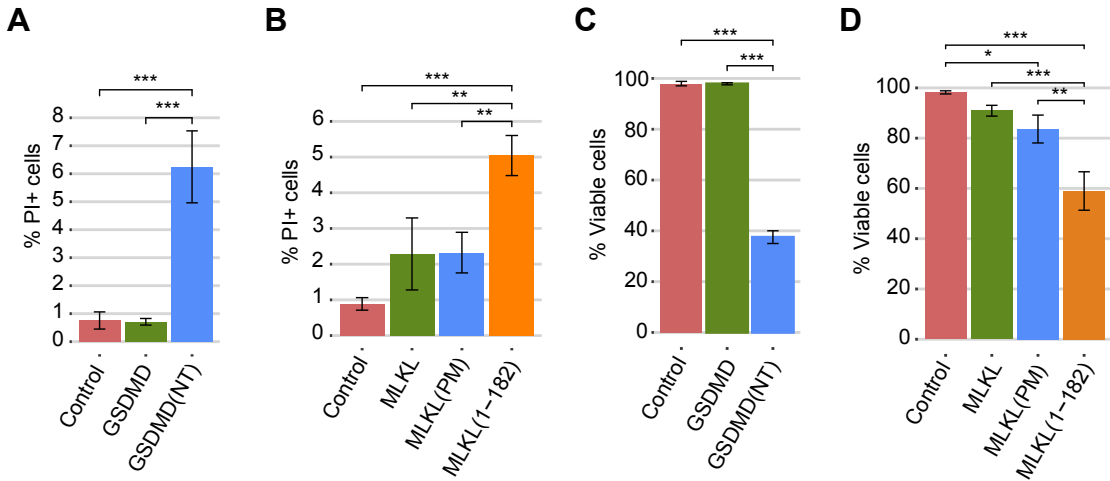

Fig. 3

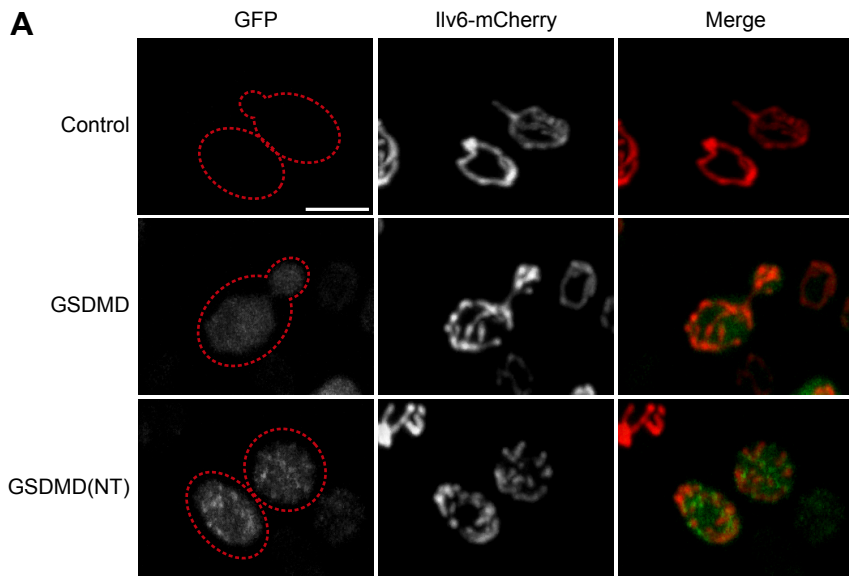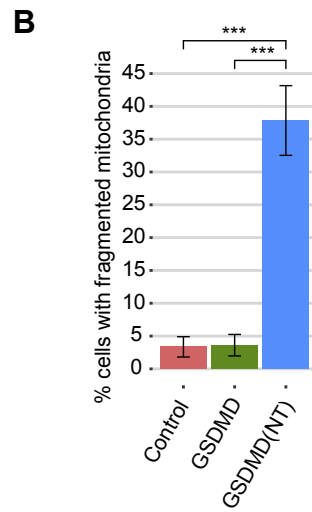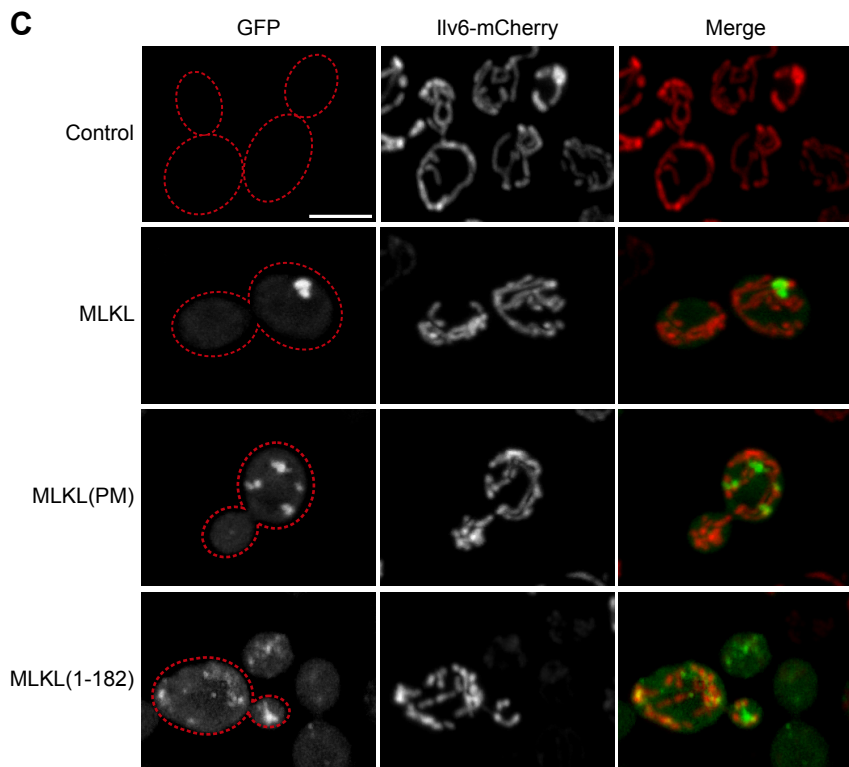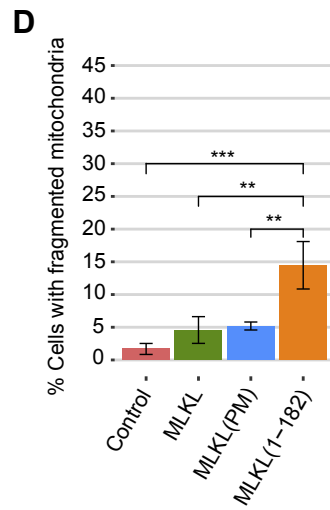

Fig. 4



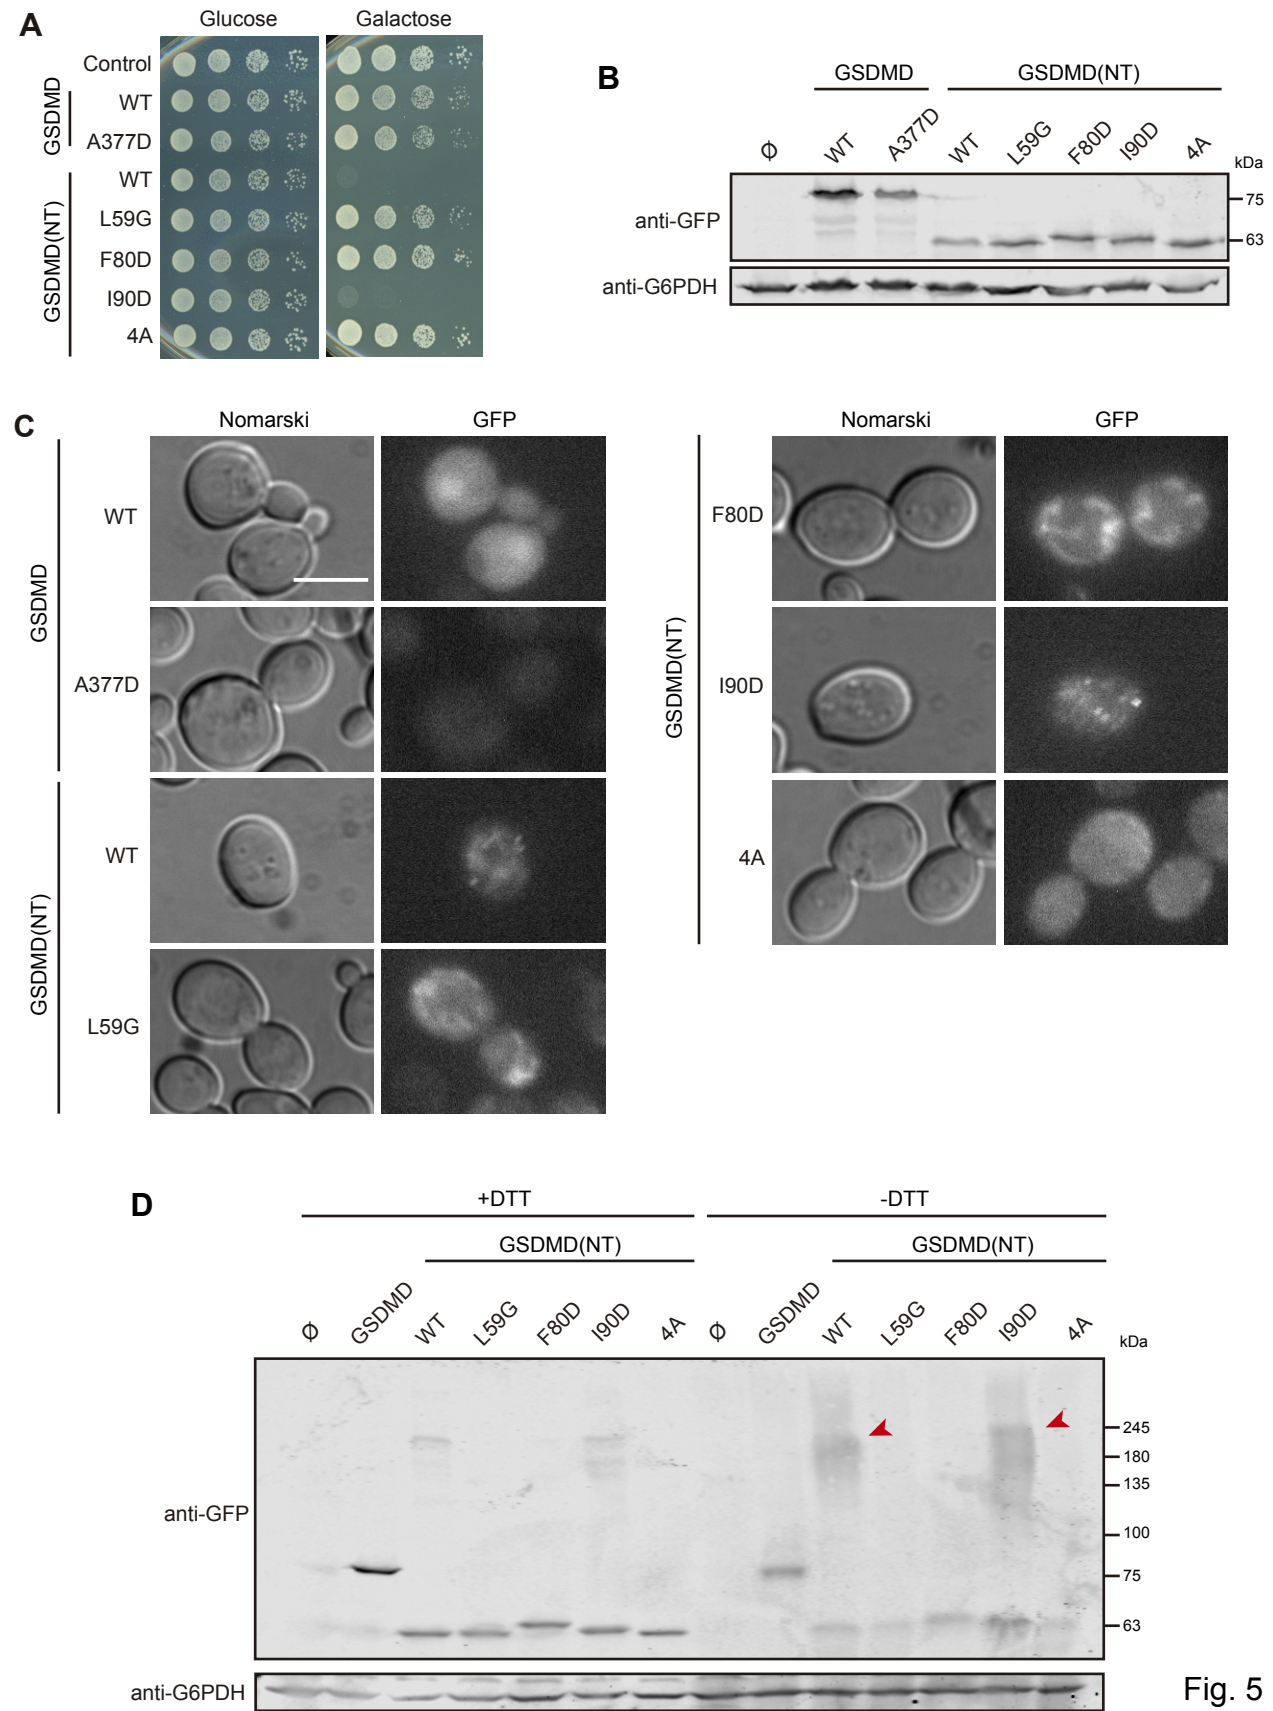

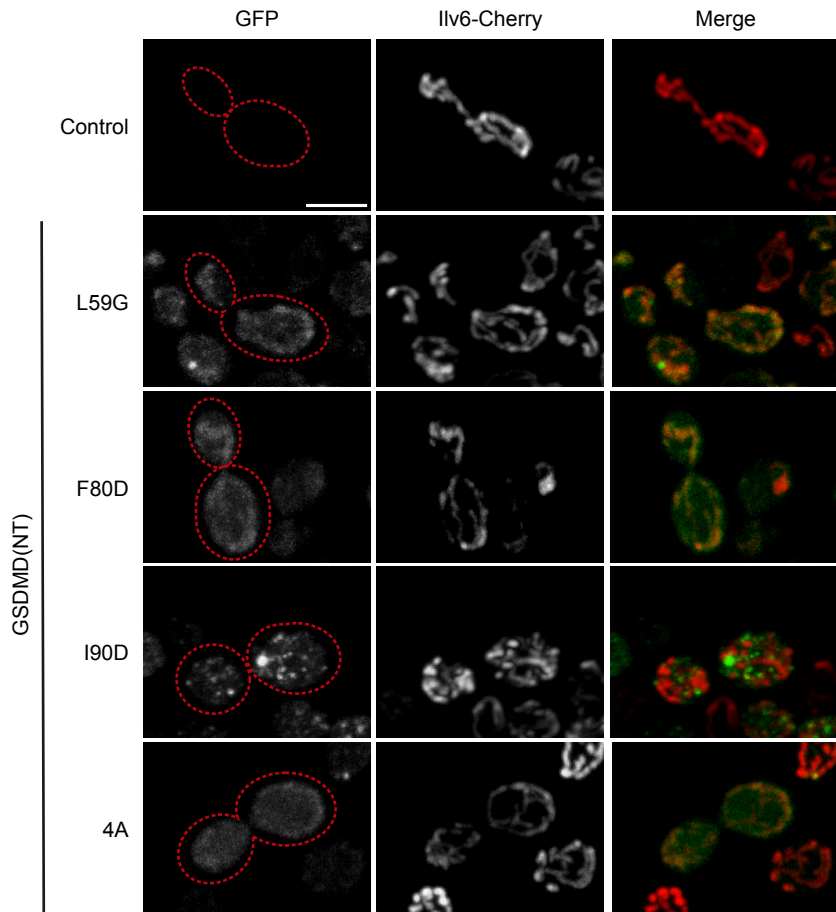

Fig. 6

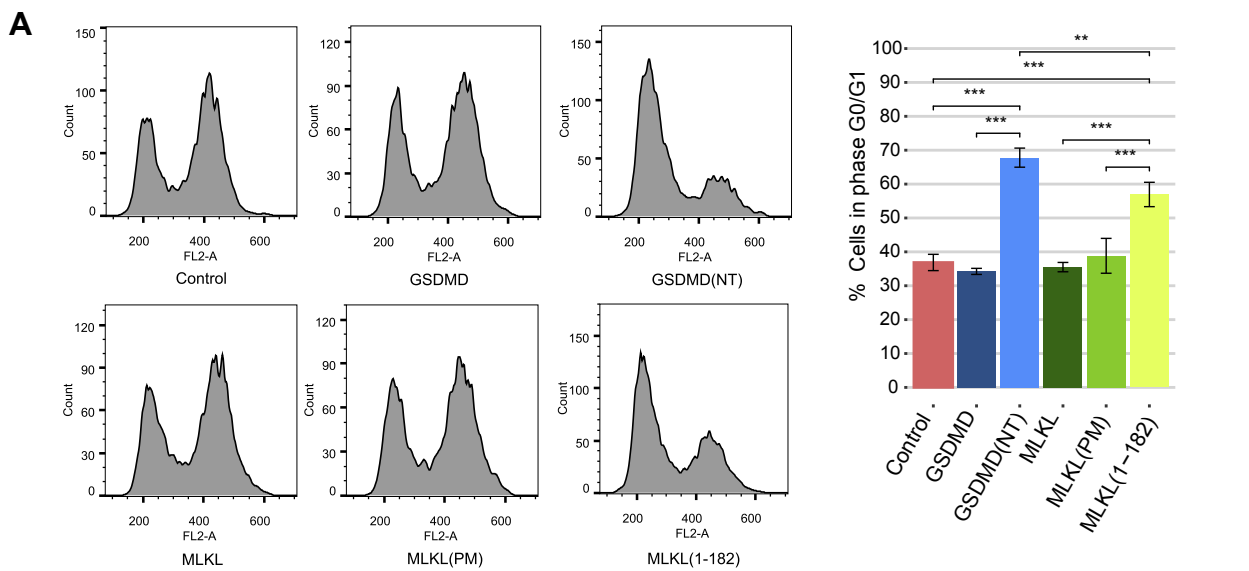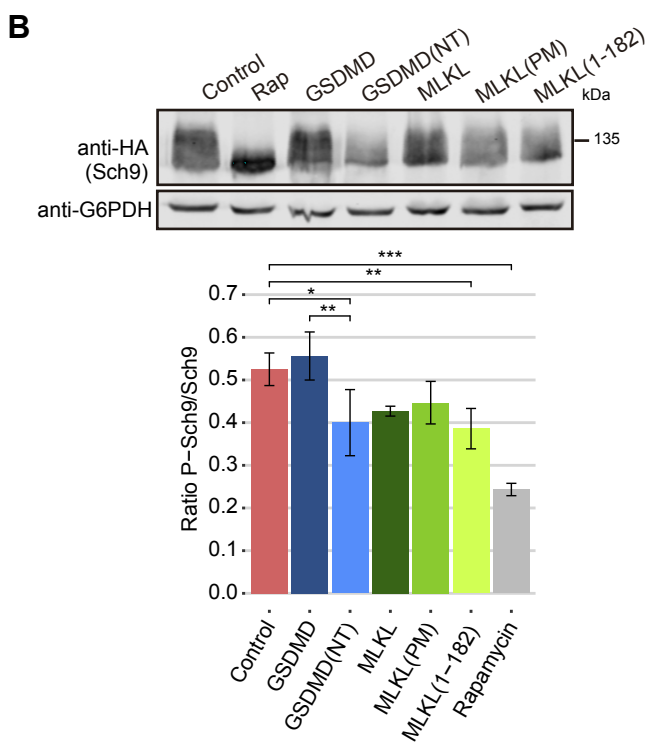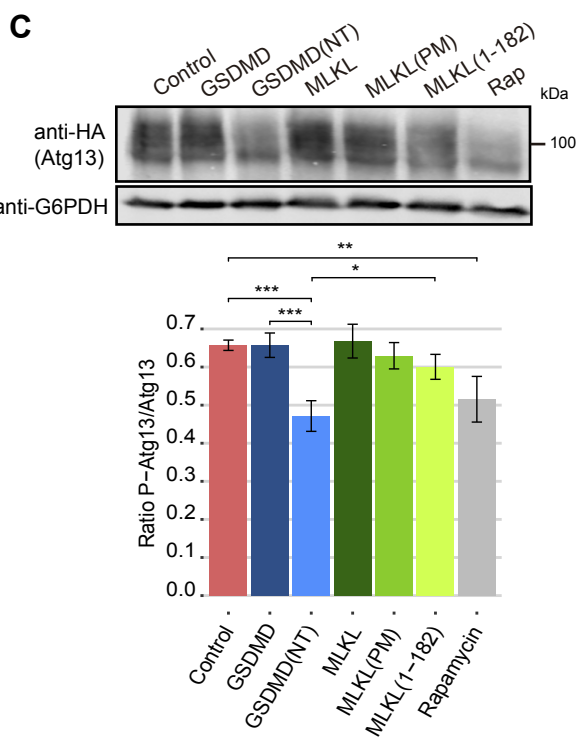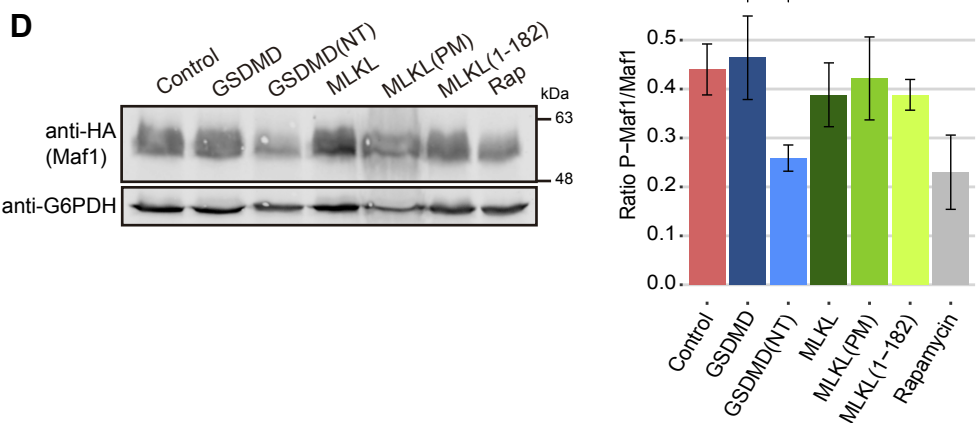

Fig. 7

**A**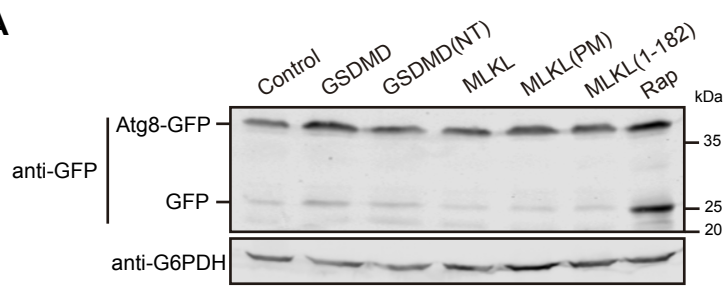**B**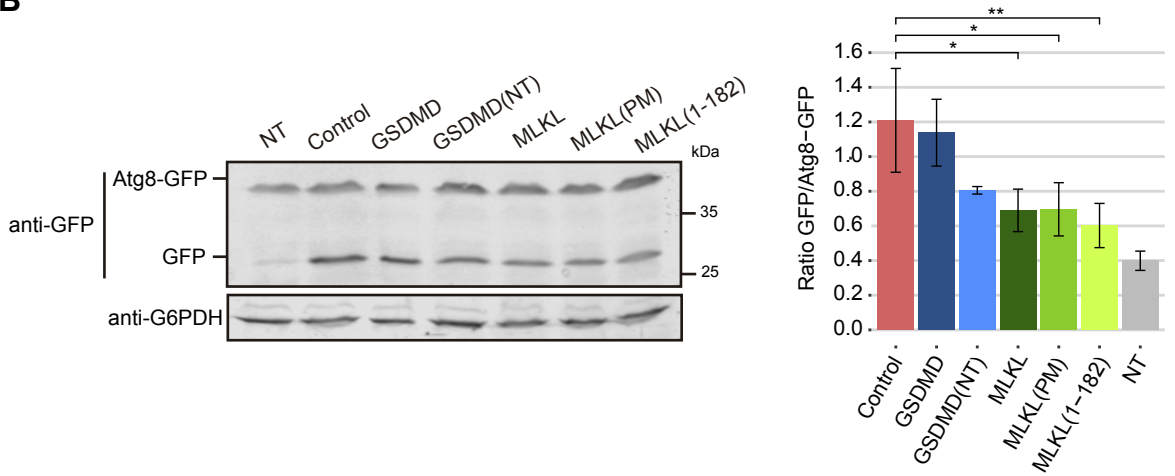**C**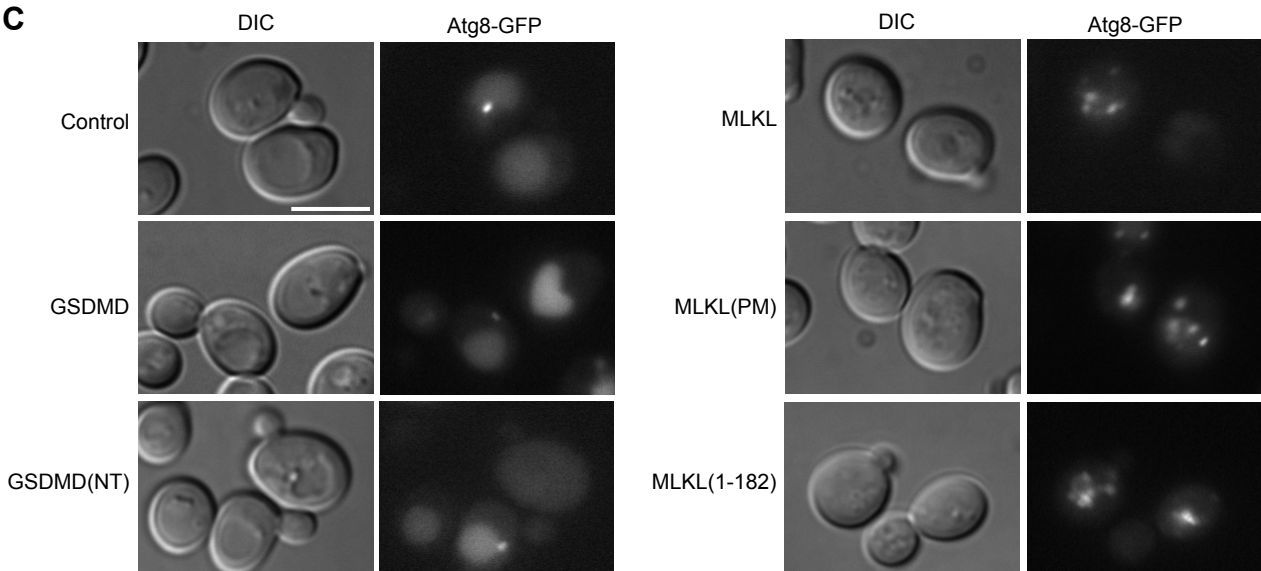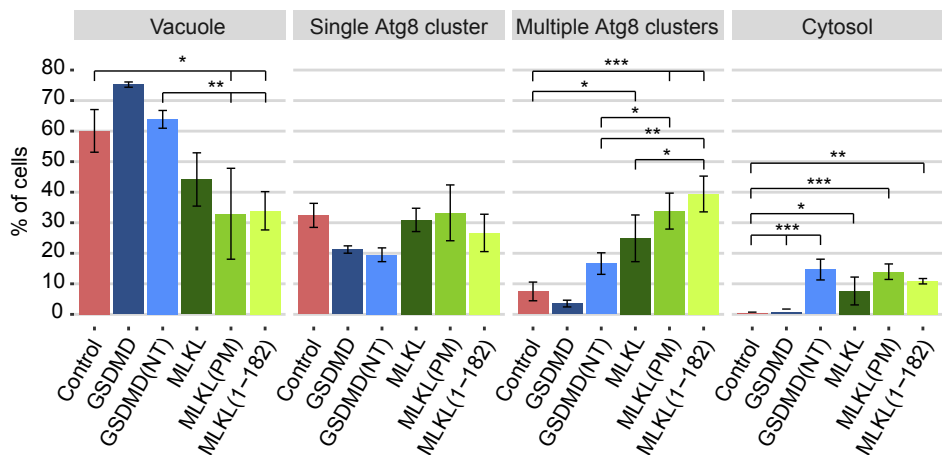

Fig. 8

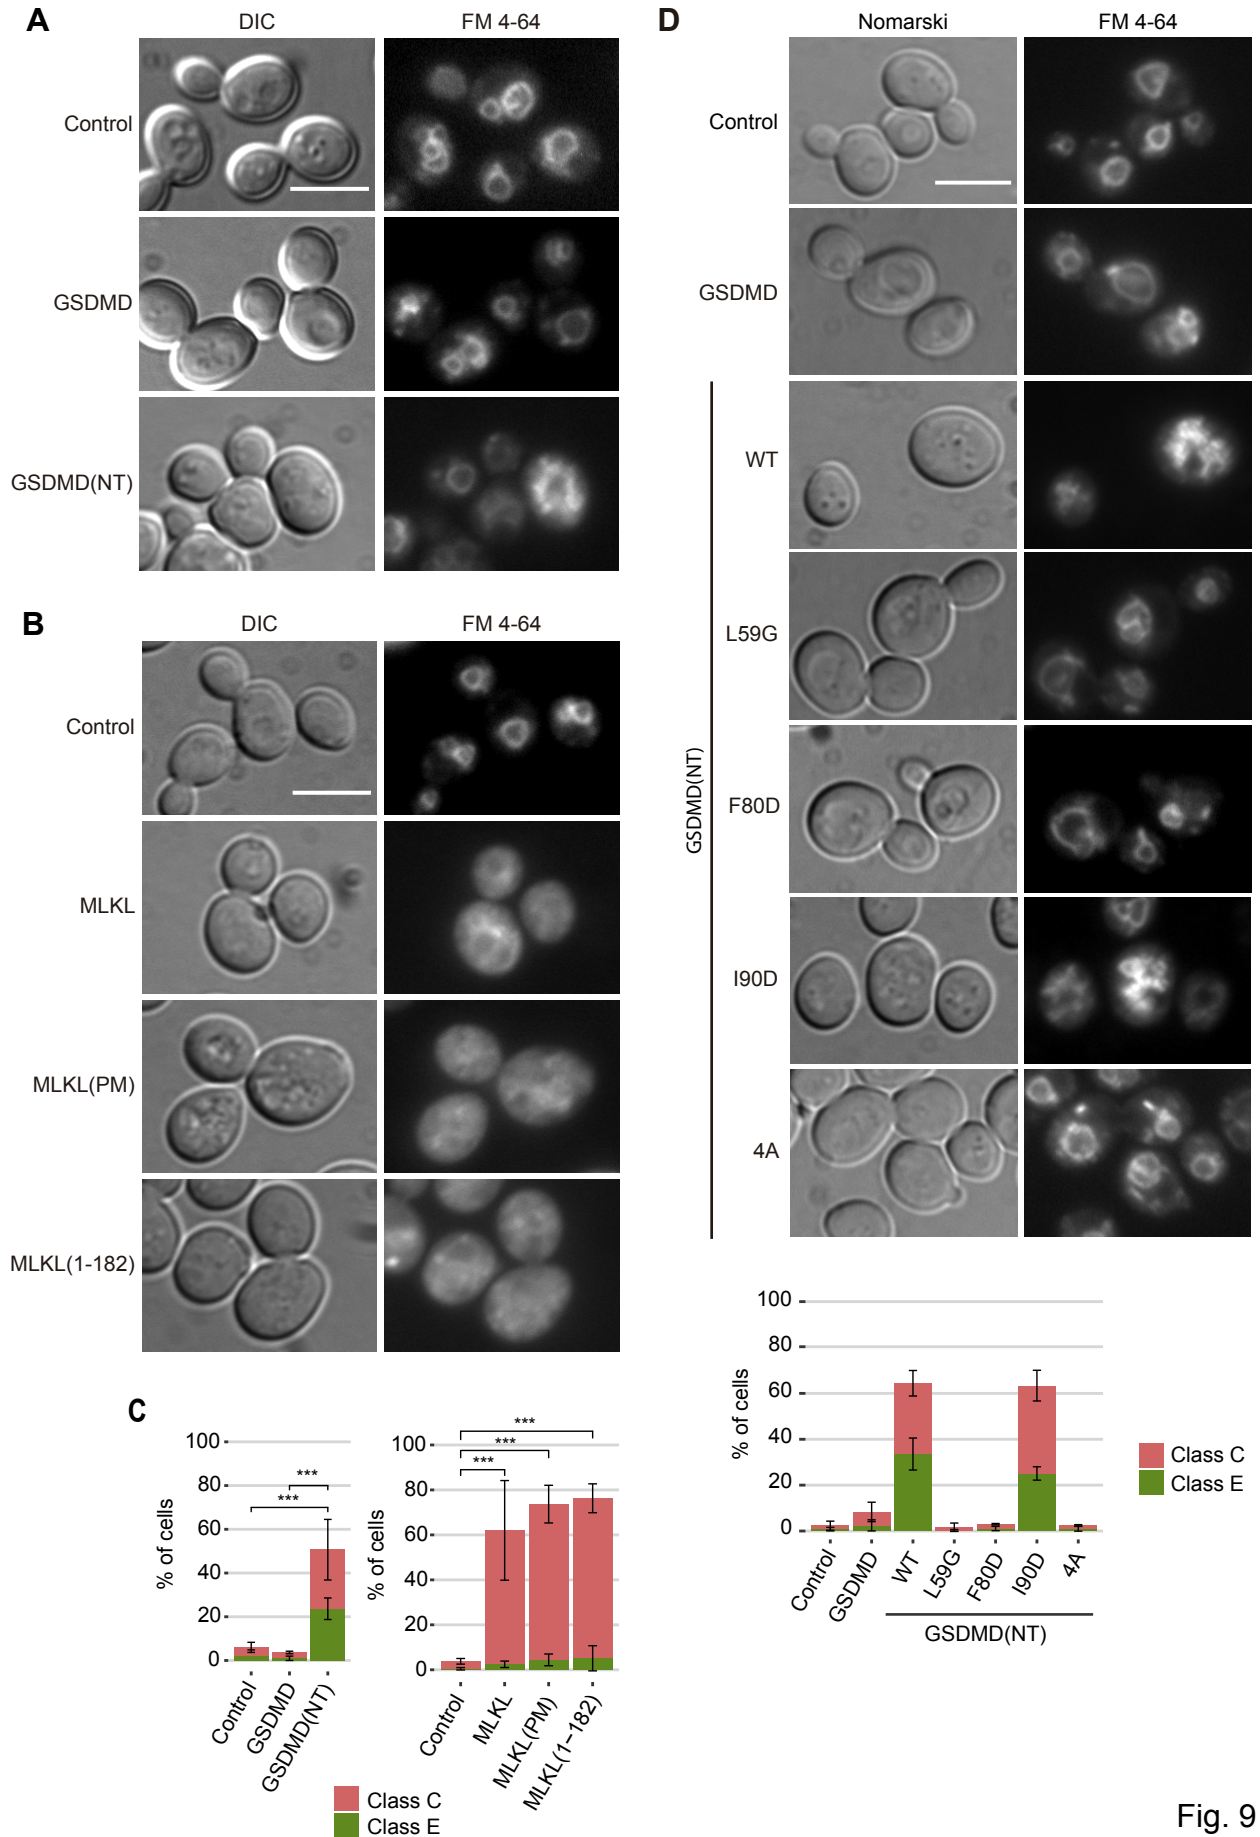

Fig. 9
